# Supplementary material
Source: ML conference proceedings conference paper supplement (https://openreview.net/forum?id=QccMOjE05b)
Supplement: supplementary_material [file 3dshapes.pdf › 3dshapes.pdf]

---

# Disentanglement Beyond Static vs. Dynamic: A Benchmark and Evaluation Framework for Multi-Factor Sequential Representations

---

Tal Barami\* Nimrod Berman\* Ilan Naiman\* Amos H. Hason Rotem Ezra Omri Azencot  
Faculty of Computer and Information Science  
Ben-Gurion University of the Negev  
{baramit, bermann, naimani, hasona, rotomez}@post.bgu.ac.il  
azencot@bgu.ac.il

## 3D-Shapes Results

Table 1: **M-Swap** on the **3D-Shapes** dataset for **Sparse-AE**.

| Category   | Type                | Floor hue        | Wall hue         | Object hue       | Shape            | Scale dynamic    | Orientation dynamic |
|------------|---------------------|------------------|------------------|------------------|------------------|------------------|---------------------|
| Uni-factor | Floor hue           | $0.81 \pm 3e-03$ | $0.15 \pm 3e-03$ | $0.13 \pm 2e-03$ | $0.29 \pm 4e-03$ | $0.20 \pm 3e-03$ | $0.37 \pm 5e-03$    |
|            | Wall hue            | $0.13 \pm 2e-03$ | $0.45 \pm 4e-03$ | $0.13 \pm 3e-03$ | $0.28 \pm 4e-03$ | $0.19 \pm 3e-03$ | $0.36 \pm 6e-03$    |
|            | Object hue          | $0.13 \pm 3e-03$ | $0.13 \pm 2e-03$ | $0.59 \pm 3e-03$ | $0.31 \pm 6e-03$ | $0.19 \pm 3e-03$ | $0.38 \pm 5e-03$    |
|            | Shape               | $0.13 \pm 2e-03$ | $0.13 \pm 2e-03$ | $0.13 \pm 3e-03$ | $0.49 \pm 3e-03$ | $0.19 \pm 3e-03$ | $0.37 \pm 5e-03$    |
|            | Scale dynamic       | $0.13 \pm 1e-03$ | $0.13 \pm 2e-03$ | $0.13 \pm 2e-03$ | $0.28 \pm 4e-03$ | $0.66 \pm 2e-03$ | $0.36 \pm 3e-03$    |
|            | Orientation dynamic | $0.13 \pm 2e-03$ | $0.13 \pm 2e-03$ | $0.13 \pm 3e-03$ | $0.39 \pm 4e-03$ | $0.24 \pm 5e-03$ | $0.69 \pm 1e-03$    |
| Two-factor | Dynamic             | $0.13 \pm 3e-03$ | $0.13 \pm 4e-03$ | $0.13 \pm 4e-03$ | $0.40 \pm 5e-03$ | $0.87 \pm 4e-03$ | $0.64 \pm 2e-03$    |
|            | Static              | $0.91 \pm 1e-03$ | $0.99 \pm 6e-04$ | $0.92 \pm 2e-03$ | $0.61 \pm 4e-03$ | $0.23 \pm 4e-03$ | $0.41 \pm 5e-03$    |

Table 2: **M-Swap** on the **3D-Shapes** dataset for **VAE**.

| Category   | Type                | Floor hue        | Wall hue         | Object hue       | Shape            | Scale dynamic    | Orientation dynamic |
|------------|---------------------|------------------|------------------|------------------|------------------|------------------|---------------------|
| Uni-factor | Floor hue           | $0.33 \pm 4e-03$ | $0.13 \pm 2e-03$ | $0.13 \pm 3e-03$ | $0.28 \pm 5e-03$ | $0.20 \pm 2e-03$ | $0.39 \pm 4e-03$    |
|            | Wall hue            | $0.16 \pm 4e-03$ | $0.98 \pm 1e-03$ | $0.13 \pm 3e-03$ | $0.28 \pm 5e-03$ | $0.20 \pm 2e-03$ | $0.40 \pm 4e-03$    |
|            | Object hue          | $0.13 \pm 4e-03$ | $0.13 \pm 2e-03$ | $0.93 \pm 2e-03$ | $0.28 \pm 5e-03$ | $0.20 \pm 2e-03$ | $0.35 \pm 5e-03$    |
|            | Shape               | $0.13 \pm 4e-03$ | $0.13 \pm 2e-03$ | $0.13 \pm 3e-03$ | $0.93 \pm 2e-03$ | $0.20 \pm 2e-03$ | $0.35 \pm 4e-03$    |
|            | Scale dynamic       | $0.13 \pm 4e-03$ | $0.13 \pm 2e-03$ | $0.13 \pm 3e-03$ | $0.28 \pm 5e-03$ | $0.88 \pm 3e-03$ | $0.35 \pm 4e-03$    |
|            | Orientation dynamic | $0.13 \pm 4e-03$ | $0.13 \pm 2e-03$ | $0.13 \pm 3e-03$ | $0.27 \pm 5e-03$ | $0.20 \pm 2e-03$ | $0.61 \pm 5e-03$    |
| Two-factor | Dynamic             | $0.13 \pm 4e-03$ | $0.13 \pm 1e-03$ | $0.13 \pm 4e-03$ | $0.27 \pm 5e-03$ | $0.89 \pm 1e-03$ | $0.62 \pm 5e-03$    |
|            | Static              | $1.00 \pm 3e-04$ | $1.00 \pm 3e-04$ | $1.00 \pm 2e-04$ | $0.99 \pm 7e-04$ | $0.22 \pm 3e-03$ | $0.51 \pm 3e-03$    |

---

\*Equal contribution

Table 3: **M-Swap** on the **3D-Shapes** dataset for  $\beta$ -VAE.

| Category   | Type                | Floor hue        | Wall hue         | Object hue       | Shape            | Scale dynamic    | Orientation dynamic |
|------------|---------------------|------------------|------------------|------------------|------------------|------------------|---------------------|
| Uni-factor | Floor hue           | $0.35 \pm 3e-03$ | $0.14 \pm 4e-03$ | $0.13 \pm 3e-03$ | $0.27 \pm 6e-03$ | $0.19 \pm 4e-03$ | $0.36 \pm 4e-03$    |
|            | Wall hue            | $0.14 \pm 3e-03$ | $0.29 \pm 4e-03$ | $0.13 \pm 4e-03$ | $0.29 \pm 5e-03$ | $0.19 \pm 4e-03$ | $0.36 \pm 5e-03$    |
|            | Object hue          | $0.13 \pm 3e-03$ | $0.13 \pm 4e-03$ | $0.55 \pm 3e-03$ | $0.27 \pm 6e-03$ | $0.19 \pm 4e-03$ | $0.35 \pm 4e-03$    |
|            | Shape               | $0.13 \pm 2e-03$ | $0.14 \pm 5e-03$ | $0.13 \pm 2e-03$ | $0.43 \pm 2e-03$ | $0.19 \pm 4e-03$ | $0.37 \pm 5e-03$    |
|            | Scale dynamic       | $0.13 \pm 3e-03$ | $0.13 \pm 3e-03$ | $0.13 \pm 2e-03$ | $0.28 \pm 5e-03$ | $0.38 \pm 5e-03$ | $0.36 \pm 3e-03$    |
|            | Orientation dynamic | $0.13 \pm 3e-03$ | $0.13 \pm 3e-03$ | $0.13 \pm 2e-03$ | $0.31 \pm 4e-03$ | $0.29 \pm 4e-03$ | $0.79 \pm 2e-03$    |
| Two-factor | Dynamic             | $0.13 \pm 3e-03$ | $0.13 \pm 2e-03$ | $0.13 \pm 2e-03$ | $0.32 \pm 9e-03$ | $0.67 \pm 3e-03$ | $0.82 \pm 2e-03$    |
|            | Static              | $0.98 \pm 1e-03$ | $1.00 \pm 5e-04$ | $0.97 \pm 8e-04$ | $0.65 \pm 1e-03$ | $0.20 \pm 4e-03$ | $0.38 \pm 4e-03$    |

Table 4: **M-Swap** on the **3D-Shapes** dataset for MGP-VAE.

| Category   | Type                | Floor hue        | Wall hue         | Object hue       | Shape            | Scale dynamic    | Orientation dynamic |
|------------|---------------------|------------------|------------------|------------------|------------------|------------------|---------------------|
| Uni-factor | Floor hue           | $0.50 \pm 3e-03$ | $0.12 \pm 3e-03$ | $0.13 \pm 3e-03$ | $0.27 \pm 3e-03$ | $0.19 \pm 3e-03$ | $0.35 \pm 5e-03$    |
|            | Wall hue            | $0.13 \pm 2e-03$ | $0.76 \pm 2e-03$ | $0.17 \pm 4e-03$ | $0.27 \pm 4e-03$ | $0.19 \pm 3e-03$ | $0.35 \pm 6e-03$    |
|            | Object hue          | $0.20 \pm 2e-03$ | $0.12 \pm 3e-03$ | $0.24 \pm 4e-03$ | $0.27 \pm 2e-03$ | $0.19 \pm 3e-03$ | $0.35 \pm 6e-03$    |
|            | Shape               | $0.13 \pm 2e-03$ | $0.12 \pm 3e-03$ | $0.13 \pm 3e-03$ | $0.35 \pm 7e-03$ | $0.19 \pm 3e-03$ | $0.35 \pm 6e-03$    |
|            | Scale dynamic       | $0.18 \pm 3e-03$ | $0.17 \pm 3e-03$ | $0.21 \pm 4e-03$ | $0.27 \pm 3e-03$ | $1.00 \pm 3e-04$ | $0.67 \pm 3e-03$    |
|            | Orientation dynamic | $0.13 \pm 2e-03$ | $0.12 \pm 3e-03$ | $0.17 \pm 3e-03$ | $0.36 \pm 6e-03$ | $0.19 \pm 3e-03$ | $0.57 \pm 3e-03$    |
| Two-factor | Dynamic             | $0.18 \pm 2e-03$ | $0.17 \pm 3e-03$ | $0.30 \pm 5e-03$ | $0.36 \pm 6e-03$ | $1.00 \pm 4e-04$ | $1.00 \pm 3e-04$    |
|            | Static              | $0.74 \pm 2e-03$ | $0.78 \pm 3e-03$ | $0.45 \pm 4e-03$ | $0.78 \pm 3e-03$ | $0.19 \pm 5e-03$ | $0.35 \pm 7e-03$    |

Table 5: **M-Swap** on the **3D-Shapes** dataset for SKD.

| Category   | Type                | Floor hue        | Wall hue         | Object hue       | Shape            | Scale dynamic    | Orientation dynamic |
|------------|---------------------|------------------|------------------|------------------|------------------|------------------|---------------------|
| Uni-factor | Floor hue           | $0.42 \pm 4e-03$ | $0.23 \pm 4e-03$ | $0.12 \pm 2e-03$ | $0.26 \pm 5e-03$ | $0.17 \pm 4e-03$ | $0.33 \pm 8e-03$    |
|            | Wall hue            | $0.13 \pm 3e-03$ | $0.19 \pm 4e-03$ | $0.16 \pm 4e-03$ | $0.26 \pm 4e-03$ | $0.17 \pm 4e-03$ | $0.33 \pm 9e-03$    |
|            | Object hue          | $0.13 \pm 3e-03$ | $0.13 \pm 2e-03$ | $0.28 \pm 9e-04$ | $0.26 \pm 5e-03$ | $0.17 \pm 4e-03$ | $0.33 \pm 6e-03$    |
|            | Shape               | $0.10 \pm 3e-03$ | $0.10 \pm 2e-03$ | $0.10 \pm 2e-03$ | $0.81 \pm 3e-03$ | $0.18 \pm 3e-03$ | $0.33 \pm 8e-03$    |
|            | Scale dynamic       | $0.10 \pm 3e-03$ | $0.10 \pm 2e-03$ | $0.10 \pm 2e-03$ | $0.28 \pm 5e-03$ | $0.95 \pm 3e-03$ | $0.33 \pm 7e-03$    |
|            | Orientation dynamic | $0.10 \pm 3e-03$ | $0.10 \pm 2e-03$ | $0.10 \pm 2e-03$ | $0.25 \pm 5e-03$ | $0.17 \pm 4e-03$ | $0.98 \pm 6e-03$    |
| Two-factor | Dynamic             | $0.10 \pm 4e-03$ | $0.10 \pm 4e-03$ | $0.10 \pm 4e-03$ | $0.29 \pm 5e-03$ | $0.95 \pm 1e-03$ | $0.99 \pm 2e-03$    |
|            | Static              | $1.00 \pm 4e-04$ | $0.99 \pm 2e-03$ | $0.98 \pm 2e-03$ | $0.90 \pm 1e-03$ | $0.18 \pm 5e-03$ | $0.34 \pm 6e-03$    |

Table 6: **M-Swap** on the **3D-Shapes** dataset for SSM-SKD.

| Category   | Type                | Floor hue        | Wall hue         | Object hue       | Shape            | Scale dynamic    | Orientation dynamic |
|------------|---------------------|------------------|------------------|------------------|------------------|------------------|---------------------|
| Uni-factor | Floor hue           | $0.95 \pm 1e-03$ | $0.10 \pm 2e-03$ | $0.10 \pm 2e-03$ | $0.25 \pm 5e-03$ | $0.17 \pm 3e-03$ | $0.33 \pm 6e-03$    |
|            | Wall hue            | $0.10 \pm 1e-03$ | $0.88 \pm 2e-03$ | $0.10 \pm 2e-03$ | $0.25 \pm 5e-03$ | $0.17 \pm 3e-03$ | $0.33 \pm 6e-03$    |
|            | Object hue          | $0.10 \pm 1e-03$ | $0.10 \pm 2e-03$ | $0.76 \pm 4e-03$ | $0.28 \pm 5e-03$ | $0.17 \pm 3e-03$ | $0.34 \pm 6e-03$    |
|            | Shape               | $0.10 \pm 1e-03$ | $0.10 \pm 3e-03$ | $0.11 \pm 2e-03$ | $0.72 \pm 5e-03$ | $0.17 \pm 3e-03$ | $0.34 \pm 6e-03$    |
|            | Scale dynamic       | $0.10 \pm 1e-03$ | $0.10 \pm 2e-03$ | $0.10 \pm 2e-03$ | $0.27 \pm 4e-03$ | $1.00 \pm 1e-04$ | $0.33 \pm 6e-03$    |
|            | Orientation dynamic | $0.10 \pm 1e-03$ | $0.11 \pm 2e-03$ | $0.10 \pm 2e-03$ | $0.25 \pm 4e-03$ | $0.17 \pm 3e-03$ | $0.94 \pm 3e-03$    |
| Two-factor | Dynamic             | $0.10 \pm 1e-03$ | $0.11 \pm 3e-03$ | $0.11 \pm 2e-03$ | $0.29 \pm 5e-03$ | $1.00 \pm 5e-05$ | $0.95 \pm 1e-03$    |
|            | Static              | $0.99 \pm 1e-03$ | $0.94 \pm 8e-04$ | $0.96 \pm 2e-03$ | $0.94 \pm 2e-03$ | $0.17 \pm 5e-03$ | $0.35 \pm 3e-03$    |

Table 7: **M-GSample** on the **3D-Shapes** dataset for Sparse-AE.

| Category   | Type                | Floor hue        | Wall hue         | Object hue       | Shape            | Scale dynamic    | Orientation dynamic |
|------------|---------------------|------------------|------------------|------------------|------------------|------------------|---------------------|
| Uni-factor | Floor hue           | $0.29 \pm 4e-03$ | $0.11 \pm 2e-03$ | $0.10 \pm 2e-03$ | $0.26 \pm 4e-03$ | $0.18 \pm 2e-03$ | $0.33 \pm 6e-03$    |
|            | Wall hue            | $0.10 \pm 4e-03$ | $0.20 \pm 3e-03$ | $0.10 \pm 3e-03$ | $0.26 \pm 1e-03$ | $0.17 \pm 2e-03$ | $0.33 \pm 6e-03$    |
|            | Object hue          | $0.10 \pm 2e-03$ | $0.10 \pm 7e-04$ | $0.23 \pm 2e-03$ | $0.26 \pm 3e-03$ | $0.17 \pm 3e-03$ | $0.34 \pm 6e-03$    |
|            | Shape               | $0.10 \pm 4e-03$ | $0.10 \pm 2e-03$ | $0.10 \pm 2e-03$ | $0.30 \pm 4e-03$ | $0.17 \pm 5e-03$ | $0.34 \pm 4e-03$    |
|            | Scale dynamic       | $0.10 \pm 4e-03$ | $0.10 \pm 3e-03$ | $0.10 \pm 3e-03$ | $0.26 \pm 4e-03$ | $0.28 \pm 3e-03$ | $0.33 \pm 5e-03$    |
|            | Orientation dynamic | $0.10 \pm 4e-03$ | $0.10 \pm 3e-03$ | $0.10 \pm 2e-03$ | $0.29 \pm 3e-03$ | $0.18 \pm 3e-03$ | $0.41 \pm 3e-03$    |
| Two-factor | Dynamic             | $0.10 \pm 4e-03$ | $0.10 \pm 2e-03$ | $0.10 \pm 1e-03$ | $0.29 \pm 5e-03$ | $0.37 \pm 7e-03$ | $0.42 \pm 5e-03$    |
|            | Static              | $0.59 \pm 5e-03$ | $0.80 \pm 2e-03$ | $0.50 \pm 4e-03$ | $0.33 \pm 5e-03$ | $0.19 \pm 4e-03$ | $0.34 \pm 6e-03$    |

Table 8: **M-GSample** on the **3D-Shapes** dataset for **VAE**.

| Category   | Type                | Floor hue        | Wall hue         | Object hue       | Shape            | Scale dynamic    | Orientation dynamic |
|------------|---------------------|------------------|------------------|------------------|------------------|------------------|---------------------|
| Uni-factor | Floor hue           | 0.32 $\pm$ 4e-03 | 0.10 $\pm$ 4e-03 | 0.10 $\pm$ 5e-03 | 0.25 $\pm$ 4e-03 | 0.17 $\pm$ 3e-03 | 0.37 $\pm$ 4e-03    |
|            | Wall hue            | 0.15 $\pm$ 1e-03 | 0.97 $\pm$ 2e-03 | 0.10 $\pm$ 3e-03 | 0.26 $\pm$ 2e-03 | 0.20 $\pm$ 4e-03 | 0.39 $\pm$ 4e-03    |
|            | Object hue          | 0.10 $\pm$ 3e-03 | 0.10 $\pm$ 3e-03 | 0.95 $\pm$ 2e-03 | 0.26 $\pm$ 3e-03 | 0.17 $\pm$ 3e-03 | 0.34 $\pm$ 7e-03    |
|            | Shape               | 0.10 $\pm$ 4e-03 | 0.10 $\pm$ 2e-03 | 0.10 $\pm$ 3e-03 | 0.85 $\pm$ 6e-03 | 0.18 $\pm$ 3e-03 | 0.34 $\pm$ 7e-03    |
|            | Scale dynamic       | 0.10 $\pm$ 3e-03 | 0.10 $\pm$ 3e-03 | 0.10 $\pm$ 4e-03 | 0.26 $\pm$ 2e-03 | 0.80 $\pm$ 3e-03 | 0.34 $\pm$ 9e-03    |
|            | Orientation dynamic | 0.10 $\pm$ 3e-03 | 0.10 $\pm$ 2e-03 | 0.10 $\pm$ 5e-03 | 0.25 $\pm$ 3e-03 | 0.18 $\pm$ 4e-03 | 0.52 $\pm$ 4e-03    |
| Two-factor | Dynamic             | 0.10 $\pm$ 2e-03 | 0.10 $\pm$ 3e-03 | 0.10 $\pm$ 1e-03 | 0.25 $\pm$ 2e-03 | 0.83 $\pm$ 4e-03 | 0.52 $\pm$ 5e-03    |
|            | Static              | 1.00 $\pm$ 3e-04 | 1.00 $\pm$ 3e-04 | 1.00 $\pm$ 2e-04 | 0.99 $\pm$ 7e-04 | 0.23 $\pm$ 9e-04 | 0.48 $\pm$ 5e-03    |

Table 9: **M-GSample** on the **3D-Shapes** dataset for  $\beta$ -VAE.

| Category   | Type                | Floor hue        | Wall hue         | Object hue       | Shape            | Scale dynamic    | Orientation dynamic |
|------------|---------------------|------------------|------------------|------------------|------------------|------------------|---------------------|
| Uni-factor | Floor hue           | 0.36 $\pm$ 2e-03 | 0.11 $\pm$ 3e-03 | 0.10 $\pm$ 2e-03 | 0.25 $\pm$ 2e-03 | 0.17 $\pm$ 3e-03 | 0.34 $\pm$ 9e-03    |
|            | Wall hue            | 0.11 $\pm$ 2e-03 | 0.29 $\pm$ 4e-03 | 0.10 $\pm$ 4e-03 | 0.27 $\pm$ 5e-03 | 0.17 $\pm$ 3e-03 | 0.35 $\pm$ 5e-03    |
|            | Object hue          | 0.10 $\pm$ 2e-03 | 0.10 $\pm$ 2e-03 | 0.58 $\pm$ 3e-03 | 0.25 $\pm$ 3e-03 | 0.17 $\pm$ 2e-03 | 0.34 $\pm$ 8e-03    |
|            | Shape               | 0.10 $\pm$ 2e-03 | 0.11 $\pm$ 3e-03 | 0.10 $\pm$ 3e-03 | 0.44 $\pm$ 3e-03 | 0.17 $\pm$ 2e-03 | 0.36 $\pm$ 6e-03    |
|            | Scale dynamic       | 0.10 $\pm$ 3e-03 | 0.10 $\pm$ 2e-03 | 0.10 $\pm$ 1e-03 | 0.26 $\pm$ 2e-03 | 0.36 $\pm$ 6e-03 | 0.34 $\pm$ 7e-03    |
|            | Orientation dynamic | 0.10 $\pm$ 4e-03 | 0.10 $\pm$ 2e-03 | 0.10 $\pm$ 2e-03 | 0.28 $\pm$ 2e-03 | 0.27 $\pm$ 4e-03 | 0.78 $\pm$ 3e-03    |
| Two-factor | Dynamic             | 0.10 $\pm$ 3e-03 | 0.10 $\pm$ 7e-04 | 0.10 $\pm$ 3e-03 | 0.30 $\pm$ 3e-03 | 0.64 $\pm$ 5e-03 | 0.80 $\pm$ 2e-03    |
|            | Static              | 0.99 $\pm$ 9e-04 | 1.00 $\pm$ 3e-04 | 0.98 $\pm$ 1e-03 | 0.65 $\pm$ 2e-03 | 0.18 $\pm$ 3e-03 | 0.37 $\pm$ 4e-03    |

Table 10: **M-GSample** on the **3D-Shapes** dataset for **MGP-VAE**.

| Category   | Type                | Floor hue        | Wall hue         | Object hue       | Shape            | Scale dynamic    | Orientation dynamic |
|------------|---------------------|------------------|------------------|------------------|------------------|------------------|---------------------|
| Uni-factor | Floor hue           | 0.15 $\pm$ 5e-03 | 0.10 $\pm$ 1e-03 | 0.10 $\pm$ 2e-03 | 0.25 $\pm$ 4e-03 | 0.17 $\pm$ 4e-03 | 0.34 $\pm$ 5e-03    |
|            | Wall hue            | 0.10 $\pm$ 3e-03 | 0.27 $\pm$ 4e-03 | 0.11 $\pm$ 2e-03 | 0.25 $\pm$ 6e-03 | 0.17 $\pm$ 4e-03 | 0.34 $\pm$ 3e-03    |
|            | Object hue          | 0.11 $\pm$ 3e-03 | 0.10 $\pm$ 3e-03 | 0.11 $\pm$ 1e-03 | 0.25 $\pm$ 2e-03 | 0.17 $\pm$ 5e-03 | 0.33 $\pm$ 3e-03    |
|            | Shape               | 0.10 $\pm$ 4e-03 | 0.10 $\pm$ 2e-03 | 0.10 $\pm$ 2e-03 | 0.26 $\pm$ 3e-03 | 0.17 $\pm$ 4e-03 | 0.33 $\pm$ 4e-03    |
|            | Scale dynamic       | 0.10 $\pm$ 3e-03 | 0.10 $\pm$ 4e-03 | 0.11 $\pm$ 3e-03 | 0.25 $\pm$ 4e-03 | 0.32 $\pm$ 4e-03 | 0.40 $\pm$ 4e-03    |
|            | Orientation dynamic | 0.10 $\pm$ 3e-03 | 0.10 $\pm$ 2e-03 | 0.10 $\pm$ 3e-03 | 0.26 $\pm$ 3e-03 | 0.17 $\pm$ 4e-03 | 0.37 $\pm$ 5e-03    |
| Two-factor | Dynamic             | 0.10 $\pm$ 1e-03 | 0.11 $\pm$ 2e-03 | 0.12 $\pm$ 2e-03 | 0.27 $\pm$ 3e-03 | 0.35 $\pm$ 4e-03 | 0.49 $\pm$ 6e-03    |
|            | Static              | 0.40 $\pm$ 1e-03 | 0.49 $\pm$ 3e-03 | 0.29 $\pm$ 5e-03 | 0.55 $\pm$ 3e-03 | 0.17 $\pm$ 3e-03 | 0.33 $\pm$ 2e-03    |

Table 11: **M-GSample** on the **3D-Shapes** dataset for **SKD**.

| Category   | Type                | Floor hue        | Wall hue         | Object hue       | Shape            | Scale dynamic    | Orientation dynamic |
|------------|---------------------|------------------|------------------|------------------|------------------|------------------|---------------------|
| Uni-factor | Floor hue           | 0.45 $\pm$ 5e-03 | 0.24 $\pm$ 3e-03 | 0.12 $\pm$ 2e-03 | 0.26 $\pm$ 5e-03 | 0.17 $\pm$ 5e-03 | 0.33 $\pm$ 4e-03    |
|            | Wall hue            | 0.14 $\pm$ 2e-03 | 0.21 $\pm$ 2e-03 | 0.16 $\pm$ 3e-03 | 0.27 $\pm$ 2e-03 | 0.17 $\pm$ 3e-03 | 0.34 $\pm$ 3e-03    |
|            | Object hue          | 0.13 $\pm$ 5e-03 | 0.13 $\pm$ 2e-03 | 0.31 $\pm$ 3e-03 | 0.27 $\pm$ 5e-03 | 0.17 $\pm$ 4e-03 | 0.34 $\pm$ 5e-03    |
|            | Shape               | 0.10 $\pm$ 4e-03 | 0.10 $\pm$ 2e-03 | 0.10 $\pm$ 3e-03 | 0.87 $\pm$ 1e-03 | 0.20 $\pm$ 3e-03 | 0.33 $\pm$ 4e-03    |
|            | Scale dynamic       | 0.10 $\pm$ 4e-03 | 0.10 $\pm$ 3e-03 | 0.10 $\pm$ 2e-03 | 0.31 $\pm$ 5e-03 | 0.97 $\pm$ 1e-03 | 0.35 $\pm$ 5e-03    |
|            | Orientation dynamic | 0.10 $\pm$ 4e-03 | 0.11 $\pm$ 3e-03 | 0.10 $\pm$ 2e-03 | 0.26 $\pm$ 3e-03 | 0.18 $\pm$ 4e-03 | 0.98 $\pm$ 2e-03    |
| Two-factor | Dynamic             | 0.11 $\pm$ 3e-03 | 0.11 $\pm$ 2e-03 | 0.11 $\pm$ 3e-03 | 0.33 $\pm$ 3e-03 | 0.97 $\pm$ 1e-03 | 0.99 $\pm$ 4e-03    |
|            | Static              | 1.00 $\pm$ 3e-04 | 0.99 $\pm$ 4e-04 | 0.99 $\pm$ 1e-03 | 0.92 $\pm$ 4e-03 | 0.21 $\pm$ 4e-03 | 0.35 $\pm$ 5e-03    |

Table 12: **M-GSample** on the **3D-Shapes** dataset for **SSM-SKD**.

| Category   | Type                | Floor hue        | Wall hue         | Object hue       | Shape            | Scale dynamic    | Orientation dynamic |
|------------|---------------------|------------------|------------------|------------------|------------------|------------------|---------------------|
| Uni-factor | Floor hue           | 0.98 $\pm$ 8e-04 | 0.10 $\pm$ 3e-03 | 0.10 $\pm$ 2e-03 | 0.25 $\pm$ 4e-03 | 0.17 $\pm$ 5e-03 | 0.34 $\pm$ 3e-03    |
|            | Wall hue            | 0.10 $\pm$ 2e-03 | 0.92 $\pm$ 4e-03 | 0.10 $\pm$ 3e-03 | 0.25 $\pm$ 4e-03 | 0.17 $\pm$ 3e-03 | 0.33 $\pm$ 3e-03    |
|            | Object hue          | 0.11 $\pm$ 3e-03 | 0.10 $\pm$ 3e-03 | 0.85 $\pm$ 4e-03 | 0.33 $\pm$ 4e-03 | 0.17 $\pm$ 3e-03 | 0.35 $\pm$ 5e-03    |
|            | Shape               | 0.11 $\pm$ 2e-03 | 0.12 $\pm$ 3e-03 | 0.14 $\pm$ 4e-03 | 0.81 $\pm$ 3e-03 | 0.17 $\pm$ 3e-03 | 0.34 $\pm$ 4e-03    |
|            | Scale dynamic       | 0.10 $\pm$ 3e-03 | 0.11 $\pm$ 2e-03 | 0.11 $\pm$ 4e-03 | 0.33 $\pm$ 3e-03 | 1.00 $\pm$ 1e-04 | 0.35 $\pm$ 5e-03    |
|            | Orientation dynamic | 0.11 $\pm$ 3e-03 | 0.14 $\pm$ 3e-03 | 0.11 $\pm$ 4e-03 | 0.27 $\pm$ 3e-03 | 0.17 $\pm$ 4e-03 | 0.96 $\pm$ 1e-03    |
| Two-factor | Dynamic             | 0.12 $\pm$ 3e-03 | 0.15 $\pm$ 2e-03 | 0.13 $\pm$ 2e-03 | 0.36 $\pm$ 4e-03 | 1.00 $\pm$ 1e-04 | 0.96 $\pm$ 2e-03    |
|            | Static              | 1.00 $\pm$ 6e-04 | 0.97 $\pm$ 2e-03 | 0.97 $\pm$ 8e-04 | 0.96 $\pm$ 1e-03 | 0.17 $\pm$ 1e-03 | 0.39 $\pm$ 1e-03    |

Table 13: **DCI** on the **3D-Shapes** dataset for **Sparse-AE**.

| <b>None</b>         | DCI-M $\uparrow$        | DCI-C $\uparrow$        | DCI-E $\uparrow$        |
|---------------------|-------------------------|-------------------------|-------------------------|
| Floor hue           | $0.90 \pm 3\text{e-}03$ | $0.95 \pm 1\text{e-}03$ | $0.94 \pm 3\text{e-}03$ |
| Wall hue            | $0.96 \pm 2\text{e-}03$ | $0.98 \pm 3\text{e-}04$ | $0.98 \pm 2\text{e-}03$ |
| Object hue          | $0.78 \pm 3\text{e-}03$ | $0.92 \pm 1\text{e-}03$ | $0.86 \pm 6\text{e-}03$ |
| Shape               | $0.78 \pm 7\text{e-}03$ | $0.84 \pm 8\text{e-}04$ | $1.00 \pm 5\text{e-}04$ |
| Scale dynamic       | $0.72 \pm 3\text{e-}03$ | $0.90 \pm 2\text{e-}03$ | $1.00 \pm 0\text{e+}00$ |
| Orientation dynamic | $0.46 \pm 1\text{e-}03$ | $0.94 \pm 7\text{e-}04$ | $0.99 \pm 1\text{e-}03$ |

Table 14: **DCI** on the **3D-Shapes** dataset for **VAE**.

| <b>None</b>         | DCI-M $\uparrow$        | DCI-C $\uparrow$        | DCI-E $\uparrow$        |
|---------------------|-------------------------|-------------------------|-------------------------|
| Floor hue           | $0.90 \pm 7\text{e-}03$ | $0.97 \pm 1\text{e-}03$ | $0.98 \pm 4\text{e-}03$ |
| Wall hue            | $0.86 \pm 5\text{e-}03$ | $0.98 \pm 1\text{e-}03$ | $0.97 \pm 4\text{e-}03$ |
| Object hue          | $0.97 \pm 3\text{e-}03$ | $0.99 \pm 2\text{e-}03$ | $1.00 \pm 7\text{e-}04$ |
| Shape               | $0.93 \pm 4\text{e-}03$ | $0.99 \pm 1\text{e-}03$ | $1.00 \pm 3\text{e-}04$ |
| Scale dynamic       | $0.78 \pm 4\text{e-}03$ | $0.98 \pm 1\text{e-}03$ | $0.99 \pm 2\text{e-}03$ |
| Orientation dynamic | $0.97 \pm 4\text{e-}03$ | $0.89 \pm 1\text{e-}03$ | $0.99 \pm 3\text{e-}03$ |

Table 15: **DCI** on the **3D-Shapes** dataset for  $\beta$ -**VAE**.

| <b>None</b>         | DCI-M $\uparrow$        | DCI-C $\uparrow$        | DCI-E $\uparrow$        |
|---------------------|-------------------------|-------------------------|-------------------------|
| Floor hue           | $0.60 \pm 3\text{e-}03$ | $0.88 \pm 1\text{e-}03$ | $0.93 \pm 3\text{e-}03$ |
| Wall hue            | $0.30 \pm 2\text{e-}03$ | $0.83 \pm 9\text{e-}04$ | $0.77 \pm 7\text{e-}03$ |
| Object hue          | $0.85 \pm 3\text{e-}03$ | $0.92 \pm 1\text{e-}03$ | $0.94 \pm 4\text{e-}03$ |
| Shape               | $0.44 \pm 3\text{e-}03$ | $0.77 \pm 7\text{e-}04$ | $0.96 \pm 5\text{e-}03$ |
| Scale dynamic       | $0.70 \pm 7\text{e-}03$ | $0.83 \pm 2\text{e-}03$ | $0.95 \pm 2\text{e-}03$ |
| Orientation dynamic | $0.48 \pm 4\text{e-}03$ | $0.94 \pm 2\text{e-}03$ | $0.99 \pm 2\text{e-}03$ |

Table 16: **DCI** on the **3D-Shapes** dataset for **MGP-VAE**.

| <b>None</b>         | DCI-M $\uparrow$ | DCI-C $\uparrow$ | DCI-E $\uparrow$ |
|---------------------|------------------|------------------|------------------|
| Floor hue           | $0.43 \pm 1e-02$ | $0.62 \pm 2e-03$ | $0.50 \pm 1e-02$ |
| Wall hue            | $0.18 \pm 6e-03$ | $0.59 \pm 8e-03$ | $0.31 \pm 7e-03$ |
| Object hue          | $0.14 \pm 5e-03$ | $0.39 \pm 2e-03$ | $0.52 \pm 9e-03$ |
| Shape               | $0.18 \pm 1e-02$ | $0.38 \pm 5e-03$ | $0.42 \pm 1e-02$ |
| Scale dynamic       | $0.22 \pm 7e-03$ | $0.62 \pm 4e-03$ | $0.41 \pm 1e-02$ |
| Orientation dynamic | $0.33 \pm 4e-03$ | $0.50 \pm 6e-03$ | $0.52 \pm 8e-03$ |

Table 17: **DCI** on the **3D-Shapes** dataset for **SKD**.

| <b>None</b>         | DCI-M $\uparrow$ | DCI-C $\uparrow$ | DCI-E $\uparrow$ |
|---------------------|------------------|------------------|------------------|
| Floor hue           | $0.21 \pm 5e-03$ | $0.68 \pm 4e-03$ | $0.58 \pm 1e-03$ |
| Wall hue            | $0.10 \pm 4e-03$ | $0.59 \pm 5e-03$ | $0.51 \pm 7e-04$ |
| Object hue          | $0.11 \pm 8e-05$ | $0.61 \pm 4e-03$ | $0.47 \pm 6e-04$ |
| Shape               | $0.49 \pm 7e-04$ | $0.78 \pm 3e-04$ | $0.81 \pm 0e+00$ |
| Scale dynamic       | $0.35 \pm 5e-02$ | $0.55 \pm 2e-03$ | $0.40 \pm 2e-04$ |
| Orientation dynamic | $0.19 \pm 6e-03$ | $0.58 \pm 7e-03$ | $0.71 \pm 2e-04$ |

Table 18: **DCI** on the **3D-Shapes** dataset for **SSM-SKD**.

| <b>None</b>         | DCI-M $\uparrow$ | DCI-C $\uparrow$ | DCI-E $\uparrow$ |
|---------------------|------------------|------------------|------------------|
| Floor hue           | $0.96 \pm 1e-03$ | $0.99 \pm 3e-04$ | $1.00 \pm 0e+00$ |
| Wall hue            | $0.94 \pm 3e-04$ | $1.00 \pm 9e-05$ | $1.00 \pm 0e+00$ |
| Object hue          | $0.87 \pm 1e-04$ | $0.99 \pm 1e-04$ | $1.00 \pm 0e+00$ |
| Shape               | $0.91 \pm 4e-04$ | $0.91 \pm 3e-04$ | $1.00 \pm 0e+00$ |
| Scale dynamic       | $0.94 \pm 8e-04$ | $0.95 \pm 3e-04$ | $0.98 \pm 5e-04$ |
| Orientation dynamic | $0.92 \pm 9e-04$ | $0.95 \pm 1e-04$ | $1.00 \pm 0e+00$ |

Table 19: **Consistency** on the **3D-Shapes** dataset for **Sparse-AE**.

| Category             | Type       | Shape            | Object hue       | Floor hue        | Wall hue         |
|----------------------|------------|------------------|------------------|------------------|------------------|
| C-Swap $\uparrow$    | Shape      | $0.49 \pm 5e-03$ | $0.90 \pm 3e-03$ | $1.00 \pm 2e-04$ | $1.00 \pm 5e-05$ |
|                      | Object hue | $0.85 \pm 2e-03$ | $0.59 \pm 6e-03$ | $0.83 \pm 2e-03$ | $0.93 \pm 2e-03$ |
|                      | Floor hue  | $0.92 \pm 2e-03$ | $0.66 \pm 5e-03$ | $0.80 \pm 2e-03$ | $0.46 \pm 3e-03$ |
|                      | Wall hue   | $0.98 \pm 1e-03$ | $0.97 \pm 2e-03$ | $0.99 \pm 9e-04$ | $0.44 \pm 4e-03$ |
| C-Sample $\uparrow$  | Shape      | $0.99 \pm 5e-04$ | $0.97 \pm 7e-04$ | $0.98 \pm 8e-04$ | $0.99 \pm 6e-04$ |
|                      | Object hue | $0.99 \pm 3e-04$ | $0.99 \pm 5e-04$ | $0.98 \pm 1e-03$ | $0.99 \pm 7e-04$ |
|                      | Floor hue  | $0.99 \pm 4e-04$ | $0.98 \pm 1e-03$ | $0.99 \pm 4e-04$ | $0.99 \pm 4e-04$ |
|                      | Wall hue   | $0.99 \pm 3e-04$ | $0.97 \pm 7e-04$ | $0.98 \pm 1e-03$ | $0.99 \pm 5e-04$ |
| GC-Sample $\uparrow$ | Shape      | $0.99 \pm 7e-04$ | $0.98 \pm 8e-04$ | $0.98 \pm 1e-03$ | $0.99 \pm 4e-04$ |
|                      | Object hue | $0.99 \pm 4e-04$ | $0.99 \pm 7e-04$ | $0.98 \pm 9e-04$ | $0.99 \pm 3e-04$ |
|                      | Floor hue  | $0.99 \pm 5e-04$ | $0.98 \pm 6e-04$ | $0.99 \pm 9e-04$ | $0.99 \pm 3e-04$ |
|                      | Wall hue   | $0.99 \pm 6e-04$ | $0.98 \pm 2e-03$ | $0.98 \pm 1e-03$ | $0.99 \pm 5e-04$ |

Table 20: **Consistency** on the **3D-Shapes** dataset for **VAE**.

| Category             | Type       | Object hue       | Wall hue         | Floor hue        | Shape            |
|----------------------|------------|------------------|------------------|------------------|------------------|
| C-Swap $\uparrow$    | Object hue | $0.93 \pm 2e-03$ | $1.00 \pm 3e-04$ | $1.00 \pm 6e-04$ | $1.00 \pm 4e-04$ |
|                      | Wall hue   | $1.00 \pm 4e-04$ | $0.98 \pm 1e-03$ | $0.35 \pm 3e-03$ | $0.98 \pm 2e-03$ |
|                      | Floor hue  | $0.98 \pm 1e-03$ | $0.98 \pm 1e-03$ | $0.32 \pm 3e-03$ | $1.00 \pm 4e-04$ |
|                      | Shape      | $0.99 \pm 5e-04$ | $1.00 \pm 2e-04$ | $1.00 \pm 1e-04$ | $0.93 \pm 2e-03$ |
| C-Sample $\uparrow$  | Object hue | $1.00 \pm 2e-04$ | $1.00 \pm 4e-04$ | $0.99 \pm 4e-04$ | $1.00 \pm 5e-04$ |
|                      | Wall hue   | $1.00 \pm 4e-04$ | $1.00 \pm 1e-04$ | $1.00 \pm 5e-04$ | $1.00 \pm 3e-04$ |
|                      | Floor hue  | $0.99 \pm 4e-04$ | $1.00 \pm 2e-04$ | $1.00 \pm 2e-04$ | $1.00 \pm 3e-04$ |
|                      | Shape      | $0.99 \pm 4e-04$ | $1.00 \pm 5e-04$ | $0.99 \pm 5e-04$ | $1.00 \pm 1e-04$ |
| GC-Sample $\uparrow$ | Object hue | $1.00 \pm 1e-04$ | $1.00 \pm 2e-04$ | $0.99 \pm 4e-04$ | $1.00 \pm 4e-04$ |
|                      | Wall hue   | $1.00 \pm 4e-04$ | $1.00 \pm 9e-05$ | $1.00 \pm 3e-04$ | $1.00 \pm 1e-04$ |
|                      | Floor hue  | $0.99 \pm 5e-04$ | $1.00 \pm 9e-05$ | $1.00 \pm 8e-04$ | $1.00 \pm 2e-04$ |
|                      | Shape      | $1.00 \pm 3e-04$ | $1.00 \pm 4e-04$ | $0.99 \pm 6e-04$ | $1.00 \pm 2e-04$ |

Table 21: **Consistency** on the **3D-Shapes** dataset for  $\beta$ -VAE.

| Category             | Type       | Wall hue         | Floor hue        | Shape            | Object hue       |
|----------------------|------------|------------------|------------------|------------------|------------------|
| C-Swap $\uparrow$    | Wall hue   | $0.29 \pm 3e-03$ | $0.44 \pm 4e-03$ | $0.52 \pm 2e-03$ | $0.64 \pm 2e-03$ |
|                      | Floor hue  | $0.34 \pm 6e-03$ | $0.35 \pm 6e-03$ | $0.97 \pm 1e-03$ | $0.75 \pm 4e-03$ |
|                      | Shape      | $0.47 \pm 8e-03$ | $0.67 \pm 6e-03$ | $0.43 \pm 1e-03$ | $0.97 \pm 1e-03$ |
|                      | Object hue | $0.78 \pm 5e-03$ | $0.98 \pm 1e-03$ | $0.95 \pm 2e-03$ | $0.55 \pm 3e-03$ |
| C-Sample $\uparrow$  | Wall hue   | $1.00 \pm 3e-04$ | $1.00 \pm 1e-04$ | $1.00 \pm 2e-04$ | $1.00 \pm 2e-04$ |
|                      | Floor hue  | $1.00 \pm 3e-04$ | $1.00 \pm 1e-04$ | $1.00 \pm 2e-04$ | $1.00 \pm 1e-04$ |
|                      | Shape      | $1.00 \pm 2e-04$ | $1.00 \pm 3e-04$ | $1.00 \pm 2e-04$ | $1.00 \pm 2e-04$ |
|                      | Object hue | $1.00 \pm 3e-04$ | $1.00 \pm 5e-04$ | $1.00 \pm 3e-04$ | $1.00 \pm 2e-04$ |
| GC-Sample $\uparrow$ | Wall hue   | $1.00 \pm 2e-04$ | $1.00 \pm 5e-04$ | $1.00 \pm 2e-04$ | $1.00 \pm 4e-04$ |
|                      | Floor hue  | $1.00 \pm 2e-04$ | $1.00 \pm 2e-04$ | $1.00 \pm 3e-04$ | $1.00 \pm 2e-04$ |
|                      | Shape      | $1.00 \pm 1e-04$ | $1.00 \pm 2e-04$ | $1.00 \pm 2e-04$ | $1.00 \pm 2e-04$ |
|                      | Object hue | $1.00 \pm 3e-04$ | $1.00 \pm 3e-04$ | $1.00 \pm 2e-04$ | $1.00 \pm 3e-04$ |

Table 22: **Consistency** on the **3D-Shapes** dataset for **MGP-VAE**.

| Category             | Type       | Object hue       | Shape            | Wall hue         | Floor hue        |
|----------------------|------------|------------------|------------------|------------------|------------------|
| C-Swap $\uparrow$    | Object hue | $0.25 \pm 4e-03$ | $0.57 \pm 3e-03$ | $1.00 \pm 3e-04$ | $0.67 \pm 4e-03$ |
|                      | Shape      | $0.99 \pm 1e-03$ | $0.35 \pm 5e-03$ | $1.00 \pm 4e-04$ | $1.00 \pm 3e-04$ |
|                      | Wall hue   | $0.83 \pm 3e-03$ | $0.84 \pm 2e-03$ | $0.76 \pm 3e-03$ | $1.00 \pm 5e-04$ |
|                      | Floor hue  | $0.99 \pm 7e-04$ | $0.99 \pm 4e-04$ | $1.00 \pm 4e-04$ | $0.50 \pm 5e-03$ |
| C-Sample $\uparrow$  | Object hue | $0.84 \pm 1e-03$ | $0.82 \pm 1e-03$ | $0.73 \pm 3e-03$ | $0.82 \pm 1e-03$ |
|                      | Shape      | $0.84 \pm 4e-03$ | $0.82 \pm 1e-03$ | $0.72 \pm 4e-03$ | $0.81 \pm 3e-03$ |
|                      | Wall hue   | $0.87 \pm 2e-03$ | $0.84 \pm 2e-03$ | $0.76 \pm 2e-03$ | $0.85 \pm 2e-03$ |
|                      | Floor hue  | $0.84 \pm 2e-03$ | $0.82 \pm 2e-03$ | $0.71 \pm 2e-03$ | $0.82 \pm 2e-03$ |
| GC-Sample $\uparrow$ | Object hue | $0.83 \pm 2e-03$ | $0.82 \pm 1e-03$ | $0.70 \pm 4e-03$ | $0.80 \pm 3e-03$ |
|                      | Shape      | $0.82 \pm 4e-03$ | $0.82 \pm 2e-03$ | $0.68 \pm 3e-03$ | $0.79 \pm 2e-03$ |
|                      | Wall hue   | $0.85 \pm 1e-03$ | $0.84 \pm 3e-03$ | $0.73 \pm 2e-03$ | $0.83 \pm 2e-03$ |
|                      | Floor hue  | $0.82 \pm 3e-03$ | $0.82 \pm 2e-03$ | $0.68 \pm 8e-04$ | $0.80 \pm 2e-03$ |

Table 23: **Consistency** on the **3D-Shapes** dataset for **SKD**.

| Category             | Type       | Object hue       | Shape            | Wall hue         | Floor hue        |
|----------------------|------------|------------------|------------------|------------------|------------------|
| C-Swap $\uparrow$    | Object hue | $0.28 \pm 6e-03$ | $0.95 \pm 1e-03$ | $0.65 \pm 1e-03$ | $0.66 \pm 6e-03$ |
|                      | Shape      | $0.99 \pm 4e-04$ | $0.81 \pm 2e-03$ | $1.00 \pm 5e-06$ | $1.00 \pm 6e-05$ |
|                      | Wall hue   | $0.33 \pm 3e-03$ | $0.84 \pm 4e-03$ | $0.19 \pm 4e-03$ | $0.53 \pm 3e-03$ |
|                      | Floor hue  | $0.39 \pm 3e-03$ | $0.83 \pm 4e-03$ | $0.25 \pm 4e-03$ | $0.42 \pm 2e-03$ |
| C-Sample $\uparrow$  | Object hue | $0.97 \pm 8e-04$ | $0.99 \pm 8e-04$ | $0.96 \pm 1e-03$ | $0.97 \pm 5e-04$ |
|                      | Shape      | $0.98 \pm 1e-03$ | $0.99 \pm 4e-04$ | $0.98 \pm 7e-04$ | $0.98 \pm 8e-04$ |
|                      | Wall hue   | $0.98 \pm 5e-04$ | $0.99 \pm 6e-04$ | $0.96 \pm 2e-03$ | $0.98 \pm 1e-03$ |
|                      | Floor hue  | $0.98 \pm 1e-03$ | $0.99 \pm 5e-04$ | $0.96 \pm 4e-04$ | $0.98 \pm 6e-04$ |
| GC-Sample $\uparrow$ | Object hue | $0.97 \pm 6e-04$ | $0.99 \pm 5e-04$ | $0.96 \pm 9e-04$ | $0.98 \pm 6e-04$ |
|                      | Shape      | $0.98 \pm 6e-04$ | $0.99 \pm 5e-04$ | $0.98 \pm 5e-04$ | $0.98 \pm 3e-04$ |
|                      | Wall hue   | $0.98 \pm 7e-04$ | $0.99 \pm 3e-04$ | $0.97 \pm 1e-03$ | $0.98 \pm 1e-03$ |
|                      | Floor hue  | $0.98 \pm 1e-03$ | $0.99 \pm 5e-04$ | $0.97 \pm 6e-04$ | $0.98 \pm 4e-04$ |

Table 24: **Consistency** on the **3D-Shapes** dataset for **SSM-SKD**.

| Category             | Type       | Shape            | Floor hue        | Wall hue         | Object hue       |
|----------------------|------------|------------------|------------------|------------------|------------------|
| C-Swap $\uparrow$    | Shape      | $0.71 \pm 4e-03$ | $1.00 \pm 8e-04$ | $1.00 \pm 6e-04$ | $0.93 \pm 3e-03$ |
|                      | Floor hue  | $1.00 \pm 1e-05$ | $0.96 \pm 1e-03$ | $1.00 \pm 8e-05$ | $1.00 \pm 2e-03$ |
|                      | Wall hue   | $1.00 \pm 7e-06$ | $1.00 \pm 4e-05$ | $0.86 \pm 5e-03$ | $1.00 \pm 4e-05$ |
|                      | Object hue | $0.96 \pm 2e-03$ | $1.00 \pm 3e-04$ | $1.00 \pm 1e-04$ | $0.77 \pm 4e-03$ |
| C-Sample $\uparrow$  | Shape      | $0.98 \pm 8e-04$ | $0.98 \pm 5e-04$ | $0.97 \pm 1e-03$ | $0.98 \pm 1e-03$ |
|                      | Floor hue  | $0.99 \pm 3e-04$ | $0.99 \pm 4e-04$ | $0.98 \pm 9e-04$ | $0.98 \pm 6e-04$ |
|                      | Wall hue   | $0.99 \pm 5e-04$ | $0.98 \pm 1e-03$ | $0.98 \pm 7e-04$ | $0.98 \pm 4e-04$ |
|                      | Object hue | $0.99 \pm 5e-04$ | $0.98 \pm 7e-04$ | $0.97 \pm 6e-04$ | $0.98 \pm 7e-04$ |
| GC-Sample $\uparrow$ | Shape      | $0.98 \pm 9e-04$ | $0.98 \pm 8e-04$ | $0.98 \pm 7e-04$ | $0.98 \pm 2e-03$ |
|                      | Floor hue  | $0.99 \pm 5e-04$ | $0.99 \pm 7e-04$ | $0.98 \pm 1e-03$ | $0.98 \pm 5e-04$ |
|                      | Wall hue   | $0.99 \pm 3e-04$ | $0.98 \pm 6e-04$ | $0.98 \pm 6e-04$ | $0.98 \pm 5e-04$ |
|                      | Object hue | $0.99 \pm 5e-04$ | $0.98 \pm 4e-04$ | $0.98 \pm 1e-03$ | $0.98 \pm 9e-04$ |
