# Supplementary material
Source: ML conference proceedings conference paper supplement (https://openreview.net/forum?id=QccMOjE05b)
Supplement: supplementary_material [file bmsaq.pdf › bmsaq.pdf]

---

# Disentanglement Beyond Static vs. Dynamic: A Benchmark and Evaluation Framework for Multi-Factor Sequential Representations

---

Tal Barami\* Nimrod Berman\* Ilan Naiman\* Amos H. Hason Rotem Ezra Omri Azencot  
Faculty of Computer and Information Science  
Ben-Gurion University of the Negev  
{baramit, bermann, naimani, hasona, rotemez}@post.bgu.ac.il  
azencot@bgu.ac.il

## BMS Air-Quality Results

Table 1: DCI on the **BMS Air-Quality** dataset for **Sparse-AE**.

| None    | DCI-M $\uparrow$ | DCI-C $\uparrow$ | DCI-E $\uparrow$ |
|---------|------------------|------------------|------------------|
| Station | $0.03 \pm 5e-03$ | $0.72 \pm 1e-03$ | $0.10 \pm 2e-02$ |
| Year    | $0.04 \pm 5e-03$ | $0.72 \pm 2e-03$ | $0.26 \pm 7e-03$ |
| Month   | $0.01 \pm 3e-03$ | $0.73 \pm 2e-03$ | $0.30 \pm 4e-02$ |
| Day     | $0.03 \pm 9e-03$ | $0.72 \pm 2e-03$ | $0.04 \pm 9e-03$ |
| Season  | $0.12 \pm 7e-03$ | $0.80 \pm 3e-03$ | $0.74 \pm 8e-03$ |

Table 2: DCI on the **BMS Air-Quality** dataset for **VAE**.

| None    | DCI-M $\uparrow$ | DCI-C $\uparrow$ | DCI-E $\uparrow$ |
|---------|------------------|------------------|------------------|
| Station | $0.07 \pm 6e-03$ | $0.76 \pm 3e-03$ | $0.10 \pm 2e-02$ |
| Year    | $0.06 \pm 8e-03$ | $0.75 \pm 2e-03$ | $0.28 \pm 7e-03$ |
| Month   | $0.04 \pm 2e-02$ | $0.75 \pm 2e-03$ | $0.37 \pm 1e-02$ |
| Day     | $0.07 \pm 2e-03$ | $0.77 \pm 1e-03$ | $0.04 \pm 6e-03$ |
| Season  | $0.39 \pm 5e-03$ | $0.87 \pm 3e-03$ | $0.81 \pm 8e-03$ |

---

\*Equal contribution

Table 3: DCI on the BMS Air-Quality dataset for  $\beta$ -VAE.

| None    | DCI-M $\uparrow$ | DCI-C $\uparrow$ | DCI-E $\uparrow$ |
|---------|------------------|------------------|------------------|
| Station | $0.07 \pm 4e-03$ | $0.77 \pm 2e-03$ | $0.11 \pm 7e-03$ |
| Year    | $0.07 \pm 2e-03$ | $0.75 \pm 3e-03$ | $0.26 \pm 2e-02$ |
| Month   | $0.08 \pm 2e-02$ | $0.75 \pm 2e-03$ | $0.36 \pm 1e-02$ |
| Day     | $0.07 \pm 7e-03$ | $0.77 \pm 2e-03$ | $0.04 \pm 1e-02$ |
| Season  | $0.38 \pm 3e-03$ | $0.88 \pm 4e-03$ | $0.79 \pm 5e-03$ |

Table 4: DCI on the BMS Air-Quality dataset for MGP-VAE.

| None    | DCI-M $\uparrow$ | DCI-C $\uparrow$ | DCI-E $\uparrow$ |
|---------|------------------|------------------|------------------|
| Station | $0.00 \pm 9e-04$ | $0.32 \pm 3e-03$ | $0.08 \pm 5e-03$ |
| Year    | $0.00 \pm 1e-03$ | $0.32 \pm 2e-03$ | $0.25 \pm 1e-02$ |
| Month   | $0.00 \pm 1e-03$ | $0.33 \pm 3e-03$ | $0.11 \pm 8e-03$ |
| Day     | $0.00 \pm 1e-03$ | $0.33 \pm 2e-03$ | $0.04 \pm 9e-03$ |
| Season  | $0.00 \pm 1e-03$ | $0.35 \pm 7e-03$ | $0.39 \pm 3e-02$ |

Table 5: DCI on the BMS Air-Quality dataset for SKD.

| None    | DCI-M $\uparrow$ | DCI-C $\uparrow$ | DCI-E $\uparrow$ |
|---------|------------------|------------------|------------------|
| Station | $0.03 \pm 6e-03$ | $0.67 \pm 1e-02$ | $0.18 \pm 1e-02$ |
| Year    | $0.02 \pm 7e-03$ | $0.66 \pm 1e-02$ | $0.31 \pm 2e-02$ |
| Month   | $0.06 \pm 5e-02$ | $0.66 \pm 2e-02$ | $0.39 \pm 3e-02$ |
| Day     | $0.04 \pm 4e-03$ | $0.68 \pm 1e-02$ | $0.04 \pm 1e-02$ |
| Season  | $0.18 \pm 7e-03$ | $0.71 \pm 3e-02$ | $0.74 \pm 1e-02$ |

Table 6: **DCI** on the **BMS Air-Quality** dataset for **SSM-SKD**.

| <b>None</b> | DCI-M $\uparrow$        | DCI-C $\uparrow$        | DCI-E $\uparrow$        |
|-------------|-------------------------|-------------------------|-------------------------|
| Station     | $0.10 \pm 8\text{e-}03$ | $0.70 \pm 4\text{e-}03$ | $0.27 \pm 1\text{e-}02$ |
| Year        | $0.09 \pm 6\text{e-}03$ | $0.67 \pm 2\text{e-}03$ | $0.44 \pm 7\text{e-}03$ |
| Month       | $0.10 \pm 2\text{e-}03$ | $0.67 \pm 1\text{e-}03$ | $0.53 \pm 7\text{e-}03$ |
| Day         | $0.08 \pm 7\text{e-}03$ | $0.68 \pm 3\text{e-}03$ | $0.06 \pm 2\text{e-}03$ |
| Season      | $0.19 \pm 2\text{e-}02$ | $0.76 \pm 4\text{e-}03$ | $0.87 \pm 2\text{e-}03$ |
