# Supplementary material
Source: ML conference proceedings conference paper supplement (https://openreview.net/forum?id=QccMOjE05b)
Supplement: supplementary_material [file dmelodies_wav.pdf › dmelodies_wav.pdf]

---

# Disentanglement Beyond Static vs. Dynamic: A Benchmark and Evaluation Framework for Multi-Factor Sequential Representations

---

Tal Barami\* Nimrod Berman\* Ilan Naiman\* Amos H. Hason Rotem Ezra Omri Azencot  
Faculty of Computer and Information Science  
Ben-Gurion University of the Negev  
{baramit, bermann, naimani, hasona, rotomez}@post.bgu.ac.il  
azencot@bgu.ac.il

## dMelodies-WAV Results

Table 1: Swap intervention on the dMelodies-WAV dataset for Sparse-AE.

| None        | Instrument       | Tonic            | Scale            | Rhythm bar1      | Arp chord1       | Arp chord2       |
|-------------|------------------|------------------|------------------|------------------|------------------|------------------|
| Instrument  | $0.24 \pm 0e+00$ | $0.08 \pm 0e+00$ | $0.32 \pm 0e+00$ | $0.03 \pm 0e+00$ | $0.49 \pm 0e+00$ | $0.49 \pm 0e+00$ |
| Tonic       | $0.24 \pm 0e+00$ | $0.08 \pm 0e+00$ | $0.32 \pm 0e+00$ | $0.03 \pm 0e+00$ | $0.49 \pm 0e+00$ | $0.49 \pm 0e+00$ |
| Scale       | $0.24 \pm 0e+00$ | $0.08 \pm 0e+00$ | $0.32 \pm 0e+00$ | $0.03 \pm 0e+00$ | $0.49 \pm 0e+00$ | $0.49 \pm 0e+00$ |
| Rhythm bar1 | $0.24 \pm 0e+00$ | $0.08 \pm 0e+00$ | $0.32 \pm 0e+00$ | $0.03 \pm 0e+00$ | $0.49 \pm 0e+00$ | $0.49 \pm 0e+00$ |
| Arp chord1  | $0.24 \pm 0e+00$ | $0.08 \pm 0e+00$ | $0.32 \pm 0e+00$ | $0.03 \pm 0e+00$ | $0.49 \pm 0e+00$ | $0.49 \pm 0e+00$ |
| Arp chord2  | $0.24 \pm 0e+00$ | $0.08 \pm 0e+00$ | $0.32 \pm 0e+00$ | $0.03 \pm 0e+00$ | $0.49 \pm 0e+00$ | $0.49 \pm 0e+00$ |

Table 2: Swap intervention on the dMelodies-WAV dataset for VAE.

| None        | Instrument       | Tonic            | Scale            | Rhythm bar1      | Arp chord1       | Arp chord2       |
|-------------|------------------|------------------|------------------|------------------|------------------|------------------|
| Instrument  | $0.24 \pm 0e+00$ | $0.08 \pm 0e+00$ | $0.32 \pm 0e+00$ | $0.03 \pm 0e+00$ | $0.49 \pm 0e+00$ | $0.49 \pm 0e+00$ |
| Tonic       | $0.24 \pm 0e+00$ | $0.08 \pm 0e+00$ | $0.32 \pm 0e+00$ | $0.03 \pm 0e+00$ | $0.49 \pm 0e+00$ | $0.49 \pm 0e+00$ |
| Scale       | $0.24 \pm 0e+00$ | $0.08 \pm 0e+00$ | $0.32 \pm 0e+00$ | $0.03 \pm 0e+00$ | $0.49 \pm 0e+00$ | $0.49 \pm 0e+00$ |
| Rhythm bar1 | $0.24 \pm 0e+00$ | $0.08 \pm 0e+00$ | $0.32 \pm 0e+00$ | $0.03 \pm 0e+00$ | $0.49 \pm 0e+00$ | $0.49 \pm 0e+00$ |
| Arp chord1  | $0.24 \pm 0e+00$ | $0.08 \pm 0e+00$ | $0.32 \pm 0e+00$ | $0.03 \pm 0e+00$ | $0.49 \pm 0e+00$ | $0.49 \pm 0e+00$ |
| Arp chord2  | $0.24 \pm 0e+00$ | $0.08 \pm 0e+00$ | $0.32 \pm 0e+00$ | $0.03 \pm 0e+00$ | $0.49 \pm 0e+00$ | $0.49 \pm 0e+00$ |

---

\*Equal contribution

Table 3: **Swap intervention** on the **dMelodies-WAV** dataset for  $\beta$ -VAE.

| None        | Instrument       | Tonic            | Scale            | Rhythm bar1      | Arp chord1       | Arp chord2       |
|-------------|------------------|------------------|------------------|------------------|------------------|------------------|
| Instrument  | $0.24 \pm 0e+00$ | $0.08 \pm 0e+00$ | $0.32 \pm 0e+00$ | $0.03 \pm 0e+00$ | $0.49 \pm 0e+00$ | $0.49 \pm 0e+00$ |
| Tonic       | $0.24 \pm 0e+00$ | $0.08 \pm 0e+00$ | $0.32 \pm 0e+00$ | $0.03 \pm 0e+00$ | $0.49 \pm 0e+00$ | $0.49 \pm 0e+00$ |
| Scale       | $0.24 \pm 0e+00$ | $0.08 \pm 0e+00$ | $0.32 \pm 0e+00$ | $0.03 \pm 0e+00$ | $0.49 \pm 0e+00$ | $0.49 \pm 0e+00$ |
| Rhythm bar1 | $0.24 \pm 0e+00$ | $0.08 \pm 0e+00$ | $0.32 \pm 0e+00$ | $0.03 \pm 0e+00$ | $0.49 \pm 0e+00$ | $0.49 \pm 0e+00$ |
| Arp chord1  | $0.24 \pm 0e+00$ | $0.08 \pm 0e+00$ | $0.32 \pm 0e+00$ | $0.03 \pm 0e+00$ | $0.49 \pm 0e+00$ | $0.49 \pm 0e+00$ |
| Arp chord2  | $0.24 \pm 0e+00$ | $0.08 \pm 0e+00$ | $0.32 \pm 0e+00$ | $0.03 \pm 0e+00$ | $0.49 \pm 0e+00$ | $0.49 \pm 0e+00$ |

Table 4: **Swap intervention** on the **dMelodies-WAV** dataset for **SKD**.

| None        | Instrument       | Tonic            | Scale            | Rhythm bar1      | Arp chord1       | Arp chord2       |
|-------------|------------------|------------------|------------------|------------------|------------------|------------------|
| Instrument  | $0.29 \pm 0e+00$ | $0.08 \pm 0e+00$ | $0.32 \pm 0e+00$ | $0.03 \pm 0e+00$ | $0.49 \pm 0e+00$ | $0.49 \pm 0e+00$ |
| Tonic       | $0.29 \pm 0e+00$ | $0.08 \pm 0e+00$ | $0.32 \pm 0e+00$ | $0.03 \pm 0e+00$ | $0.49 \pm 0e+00$ | $0.49 \pm 0e+00$ |
| Scale       | $0.29 \pm 0e+00$ | $0.08 \pm 0e+00$ | $0.32 \pm 0e+00$ | $0.03 \pm 0e+00$ | $0.49 \pm 0e+00$ | $0.49 \pm 0e+00$ |
| Rhythm bar1 | $0.29 \pm 0e+00$ | $0.08 \pm 0e+00$ | $0.32 \pm 0e+00$ | $0.03 \pm 0e+00$ | $0.49 \pm 0e+00$ | $0.49 \pm 0e+00$ |
| Arp chord1  | $0.29 \pm 0e+00$ | $0.08 \pm 0e+00$ | $0.32 \pm 0e+00$ | $0.03 \pm 0e+00$ | $0.49 \pm 0e+00$ | $0.49 \pm 0e+00$ |
| Arp chord2  | $0.29 \pm 0e+00$ | $0.08 \pm 0e+00$ | $0.32 \pm 0e+00$ | $0.03 \pm 0e+00$ | $0.49 \pm 0e+00$ | $0.49 \pm 0e+00$ |

Table 5: **Swap intervention** on the **dMelodies-WAV** dataset for **SSM-SKD**.

| None        | Instrument       | Tonic            | Scale            | Rhythm bar1      | Arp chord1       | Arp chord2       |
|-------------|------------------|------------------|------------------|------------------|------------------|------------------|
| Instrument  | $0.31 \pm 2e-03$ | $0.08 \pm 2e-03$ | $0.33 \pm 1e-02$ | $0.04 \pm 2e-03$ | $0.51 \pm 1e-02$ | $0.50 \pm 9e-03$ |
| Tonic       | $0.31 \pm 2e-03$ | $0.08 \pm 4e-03$ | $0.33 \pm 9e-03$ | $0.05 \pm 5e-03$ | $0.51 \pm 2e-02$ | $0.50 \pm 1e-02$ |
| Scale       | $0.30 \pm 2e-03$ | $0.08 \pm 3e-03$ | $0.34 \pm 2e-02$ | $0.06 \pm 6e-03$ | $0.56 \pm 1e-02$ | $0.51 \pm 1e-02$ |
| Rhythm bar1 | $0.30 \pm 5e-03$ | $0.08 \pm 3e-03$ | $0.34 \pm 1e-02$ | $0.06 \pm 4e-03$ | $0.51 \pm 1e-02$ | $0.50 \pm 9e-03$ |
| Arp chord1  | $0.31 \pm 2e-03$ | $0.08 \pm 6e-03$ | $0.34 \pm 9e-03$ | $0.05 \pm 3e-03$ | $0.52 \pm 1e-02$ | $0.51 \pm 9e-03$ |
| Arp chord2  | $0.30 \pm 4e-03$ | $0.08 \pm 5e-03$ | $0.33 \pm 1e-02$ | $0.06 \pm 7e-03$ | $0.52 \pm 9e-03$ | $0.57 \pm 8e-03$ |

Table 6: **Sample intervention** on the **dMelodies-WAV** dataset for **Sparse-AE**.

| None        | Instrument       | Tonic            | Scale            | Rhythm bar1      | Arp chord1       | Arp chord2       |
|-------------|------------------|------------------|------------------|------------------|------------------|------------------|
| Instrument  | $0.24 \pm 0e+00$ | $0.08 \pm 0e+00$ | $0.32 \pm 0e+00$ | $0.03 \pm 0e+00$ | $0.49 \pm 0e+00$ | $0.49 \pm 0e+00$ |
| Tonic       | $0.24 \pm 0e+00$ | $0.08 \pm 0e+00$ | $0.32 \pm 0e+00$ | $0.03 \pm 0e+00$ | $0.49 \pm 0e+00$ | $0.49 \pm 0e+00$ |
| Scale       | $0.24 \pm 0e+00$ | $0.08 \pm 0e+00$ | $0.32 \pm 0e+00$ | $0.03 \pm 0e+00$ | $0.49 \pm 0e+00$ | $0.49 \pm 0e+00$ |
| Rhythm bar1 | $0.24 \pm 0e+00$ | $0.08 \pm 0e+00$ | $0.32 \pm 0e+00$ | $0.03 \pm 0e+00$ | $0.49 \pm 0e+00$ | $0.49 \pm 0e+00$ |
| Arp chord1  | $0.24 \pm 0e+00$ | $0.08 \pm 0e+00$ | $0.32 \pm 0e+00$ | $0.03 \pm 0e+00$ | $0.49 \pm 0e+00$ | $0.49 \pm 0e+00$ |
| Arp chord2  | $0.24 \pm 0e+00$ | $0.08 \pm 0e+00$ | $0.32 \pm 0e+00$ | $0.03 \pm 0e+00$ | $0.49 \pm 0e+00$ | $0.49 \pm 0e+00$ |

Table 7: **Sample intervention** on the **dMelodies-WAV** dataset for **VAE**.

| None        | Instrument       | Tonic            | Scale            | Rhythm bar1      | Arp chord1       | Arp chord2       |
|-------------|------------------|------------------|------------------|------------------|------------------|------------------|
| Instrument  | $0.24 \pm 0e+00$ | $0.08 \pm 0e+00$ | $0.32 \pm 0e+00$ | $0.03 \pm 0e+00$ | $0.49 \pm 0e+00$ | $0.49 \pm 0e+00$ |
| Tonic       | $0.24 \pm 0e+00$ | $0.08 \pm 0e+00$ | $0.32 \pm 0e+00$ | $0.03 \pm 0e+00$ | $0.49 \pm 0e+00$ | $0.49 \pm 0e+00$ |
| Scale       | $0.24 \pm 0e+00$ | $0.08 \pm 0e+00$ | $0.32 \pm 0e+00$ | $0.03 \pm 0e+00$ | $0.49 \pm 0e+00$ | $0.49 \pm 0e+00$ |
| Rhythm bar1 | $0.24 \pm 0e+00$ | $0.08 \pm 0e+00$ | $0.32 \pm 0e+00$ | $0.03 \pm 0e+00$ | $0.49 \pm 0e+00$ | $0.49 \pm 0e+00$ |
| Arp chord1  | $0.24 \pm 0e+00$ | $0.08 \pm 0e+00$ | $0.32 \pm 0e+00$ | $0.03 \pm 0e+00$ | $0.49 \pm 0e+00$ | $0.49 \pm 0e+00$ |
| Arp chord2  | $0.24 \pm 0e+00$ | $0.08 \pm 0e+00$ | $0.32 \pm 0e+00$ | $0.03 \pm 0e+00$ | $0.49 \pm 0e+00$ | $0.49 \pm 0e+00$ |

Table 8: **Sample intervention** on the **dMelodies-WAV** dataset for  $\beta$ -VAE.

| None        | Instrument       | Tonic            | Scale            | Rhythm bar1      | Arp chord1       | Arp chord2       |
|-------------|------------------|------------------|------------------|------------------|------------------|------------------|
| Instrument  | $0.24 \pm 0e+00$ | $0.08 \pm 0e+00$ | $0.32 \pm 0e+00$ | $0.03 \pm 0e+00$ | $0.49 \pm 0e+00$ | $0.49 \pm 0e+00$ |
| Tonic       | $0.24 \pm 0e+00$ | $0.08 \pm 0e+00$ | $0.32 \pm 0e+00$ | $0.03 \pm 0e+00$ | $0.49 \pm 0e+00$ | $0.49 \pm 0e+00$ |
| Scale       | $0.24 \pm 0e+00$ | $0.08 \pm 0e+00$ | $0.32 \pm 0e+00$ | $0.03 \pm 0e+00$ | $0.49 \pm 0e+00$ | $0.49 \pm 0e+00$ |
| Rhythm bar1 | $0.24 \pm 0e+00$ | $0.08 \pm 0e+00$ | $0.32 \pm 0e+00$ | $0.03 \pm 0e+00$ | $0.49 \pm 0e+00$ | $0.49 \pm 0e+00$ |
| Arp chord1  | $0.24 \pm 0e+00$ | $0.08 \pm 0e+00$ | $0.32 \pm 0e+00$ | $0.03 \pm 0e+00$ | $0.49 \pm 0e+00$ | $0.49 \pm 0e+00$ |
| Arp chord2  | $0.24 \pm 0e+00$ | $0.08 \pm 0e+00$ | $0.32 \pm 0e+00$ | $0.03 \pm 0e+00$ | $0.49 \pm 0e+00$ | $0.49 \pm 0e+00$ |

Table 9: **Sample intervention** on the **dMelodies-WAV** dataset for SKD.

| None        | Instrument       | Tonic            | Scale            | Rhythm bar1      | Arp chord1       | Arp chord2       |
|-------------|------------------|------------------|------------------|------------------|------------------|------------------|
| Instrument  | $0.29 \pm 0e+00$ | $0.08 \pm 0e+00$ | $0.32 \pm 0e+00$ | $0.03 \pm 0e+00$ | $0.49 \pm 0e+00$ | $0.49 \pm 0e+00$ |
| Tonic       | $0.29 \pm 0e+00$ | $0.08 \pm 0e+00$ | $0.32 \pm 0e+00$ | $0.03 \pm 0e+00$ | $0.49 \pm 0e+00$ | $0.49 \pm 0e+00$ |
| Scale       | $0.29 \pm 0e+00$ | $0.08 \pm 0e+00$ | $0.32 \pm 0e+00$ | $0.03 \pm 0e+00$ | $0.49 \pm 0e+00$ | $0.49 \pm 0e+00$ |
| Rhythm bar1 | $0.29 \pm 0e+00$ | $0.08 \pm 0e+00$ | $0.32 \pm 0e+00$ | $0.03 \pm 0e+00$ | $0.49 \pm 0e+00$ | $0.49 \pm 0e+00$ |
| Arp chord1  | $0.29 \pm 0e+00$ | $0.08 \pm 0e+00$ | $0.32 \pm 0e+00$ | $0.03 \pm 0e+00$ | $0.49 \pm 0e+00$ | $0.49 \pm 0e+00$ |
| Arp chord2  | $0.29 \pm 0e+00$ | $0.08 \pm 0e+00$ | $0.32 \pm 0e+00$ | $0.03 \pm 0e+00$ | $0.49 \pm 0e+00$ | $0.49 \pm 0e+00$ |

Table 10: **Sample intervention** on the **dMelodies-WAV** dataset for SSM-SKD.

| None        | Instrument       | Tonic            | Scale            | Rhythm bar1      | Arp chord1       | Arp chord2       |
|-------------|------------------|------------------|------------------|------------------|------------------|------------------|
| Instrument  | $0.29 \pm 2e-03$ | $0.09 \pm 4e-03$ | $0.33 \pm 1e-02$ | $0.04 \pm 3e-03$ | $0.50 \pm 9e-03$ | $0.50 \pm 8e-03$ |
| Tonic       | $0.29 \pm 2e-03$ | $0.08 \pm 2e-03$ | $0.33 \pm 1e-02$ | $0.05 \pm 5e-03$ | $0.52 \pm 1e-02$ | $0.51 \pm 1e-02$ |
| Scale       | $0.29 \pm 1e-03$ | $0.07 \pm 5e-03$ | $0.33 \pm 2e-02$ | $0.06 \pm 4e-03$ | $0.58 \pm 3e-02$ | $0.52 \pm 2e-03$ |
| Rhythm bar1 | $0.29 \pm 2e-03$ | $0.09 \pm 2e-03$ | $0.33 \pm 2e-02$ | $0.07 \pm 5e-03$ | $0.52 \pm 1e-02$ | $0.52 \pm 1e-02$ |
| Arp chord1  | $0.29 \pm 2e-03$ | $0.08 \pm 5e-03$ | $0.33 \pm 2e-02$ | $0.05 \pm 4e-03$ | $0.54 \pm 1e-02$ | $0.51 \pm 9e-03$ |
| Arp chord2  | $0.29 \pm 1e-03$ | $0.07 \pm 6e-03$ | $0.33 \pm 1e-02$ | $0.06 \pm 2e-03$ | $0.52 \pm 1e-02$ | $0.57 \pm 2e-02$ |

Table 11: **DCI** on the **dMelodies-WAV** dataset for **Sparse-AE**.

| None        | DCI-M $\uparrow$ | DCI-C $\uparrow$ | DCI-E $\uparrow$ |
|-------------|------------------|------------------|------------------|
| Instrument  | $0.05 \pm 6e-03$ | $0.70 \pm 2e-03$ | $0.73 \pm 1e-02$ |
| Tonic       | $0.01 \pm 8e-03$ | $0.68 \pm 7e-04$ | $0.08 \pm 5e-03$ |
| Scale       | $0.01 \pm 3e-03$ | $0.68 \pm 2e-03$ | $0.33 \pm 2e-02$ |
| Rhythm bar1 | $0.01 \pm 6e-03$ | $0.68 \pm 5e-04$ | $0.09 \pm 2e-02$ |
| Arp chord1  | $0.01 \pm 4e-03$ | $0.68 \pm 2e-03$ | $0.51 \pm 3e-02$ |
| Arp chord2  | $0.01 \pm 5e-03$ | $0.68 \pm 2e-03$ | $0.51 \pm 3e-02$ |

Table 12: **DCI** on the **dMelodies-WAV** dataset for **VAE**.

| <b>None</b> | DCI-M $\uparrow$ | DCI-C $\uparrow$ | DCI-E $\uparrow$ |
|-------------|------------------|------------------|------------------|
| Instrument  | $0.00 \pm 1e-03$ | $0.69 \pm 2e-03$ | $0.25 \pm 2e-02$ |
| Tonic       | $0.00 \pm 3e-03$ | $0.69 \pm 5e-04$ | $0.08 \pm 5e-03$ |
| Scale       | $0.00 \pm 2e-03$ | $0.69 \pm 3e-03$ | $0.31 \pm 4e-02$ |
| Rhythm bar1 | $0.06 \pm 2e-02$ | $0.68 \pm 4e-04$ | $0.10 \pm 2e-02$ |
| Arp chord1  | $0.00 \pm 3e-03$ | $0.69 \pm 9e-03$ | $0.50 \pm 3e-02$ |
| Arp chord2  | $0.00 \pm 4e-03$ | $0.69 \pm 6e-03$ | $0.49 \pm 1e-02$ |

Table 13: **DCI** on the **dMelodies-WAV** dataset for  $\beta$ -**VAE**.

| <b>None</b> | DCI-M $\uparrow$ | DCI-C $\uparrow$ | DCI-E $\uparrow$ |
|-------------|------------------|------------------|------------------|
| Instrument  | $0.64 \pm 8e-03$ | $0.87 \pm 4e-03$ | $0.78 \pm 9e-03$ |
| Tonic       | $0.06 \pm 4e-03$ | $0.73 \pm 1e-03$ | $0.09 \pm 8e-03$ |
| Scale       | $0.06 \pm 6e-03$ | $0.74 \pm 2e-03$ | $0.33 \pm 2e-02$ |
| Rhythm bar1 | $0.06 \pm 2e-02$ | $0.71 \pm 6e-04$ | $0.25 \pm 2e-02$ |
| Arp chord1  | $0.06 \pm 5e-03$ | $0.74 \pm 6e-03$ | $0.52 \pm 2e-02$ |
| Arp chord2  | $0.05 \pm 2e-03$ | $0.74 \pm 4e-03$ | $0.49 \pm 1e-02$ |

Table 14: **DCI** on the **dMelodies-WAV** dataset for **SKD**.

| <b>None</b> | DCI-M $\uparrow$ | DCI-C $\uparrow$ | DCI-E $\uparrow$ |
|-------------|------------------|------------------|------------------|
| Instrument  | $0.06 \pm 2e-02$ | $0.68 \pm 1e-02$ | $0.99 \pm 0e+00$ |
| Tonic       | $0.07 \pm 1e-02$ | $0.56 \pm 5e-03$ | $0.23 \pm 1e-02$ |
| Scale       | $0.09 \pm 2e-02$ | $0.56 \pm 7e-03$ | $0.36 \pm 3e-03$ |
| Rhythm bar1 | $0.12 \pm 6e-03$ | $0.76 \pm 3e-02$ | $0.94 \pm 1e-03$ |
| Arp chord1  | $0.08 \pm 5e-03$ | $0.56 \pm 8e-03$ | $0.68 \pm 2e-03$ |
| Arp chord2  | $0.08 \pm 1e-02$ | $0.57 \pm 1e-02$ | $0.67 \pm 1e-03$ |

Table 15: **DCI** on the **dMelodies-WAV** dataset for **SSM-SKD**.

| <b>None</b> | DCI-M $\uparrow$        | DCI-C $\uparrow$        | DCI-E $\uparrow$        |
|-------------|-------------------------|-------------------------|-------------------------|
| Instrument  | $0.37 \pm 1\text{e-}02$ | $0.80 \pm 3\text{e-}03$ | $1.00 \pm 0\text{e+}00$ |
| Tonic       | $0.06 \pm 1\text{e-}02$ | $0.63 \pm 2\text{e-}03$ | $0.29 \pm 9\text{e-}03$ |
| Scale       | $0.06 \pm 2\text{e-}03$ | $0.63 \pm 2\text{e-}03$ | $0.38 \pm 6\text{e-}03$ |
| Rhythm bar1 | $0.11 \pm 4\text{e-}03$ | $0.66 \pm 1\text{e-}02$ | $0.99 \pm 3\text{e-}03$ |
| Arp chord1  | $0.12 \pm 1\text{e-}02$ | $0.64 \pm 3\text{e-}03$ | $0.70 \pm 3\text{e-}03$ |
| Arp chord2  | $0.06 \pm 2\text{e-}03$ | $0.66 \pm 4\text{e-}03$ | $0.66 \pm 1\text{e-}03$ |
