# Supplementary material
Source: ML conference proceedings conference paper supplement (https://openreview.net/forum?id=QccMOjE05b)
Supplement: supplementary_material [file dsprites_static.pdf › dsprites_static.pdf]

---

# Disentanglement Beyond Static vs. Dynamic: A Benchmark and Evaluation Framework for Multi-Factor Sequential Representations

---

Tal Barami\* Nimrod Berman\* Ilan Naiman\* Amos H. Hason Rotem Ezra Omri Azencot

Faculty of Computer and Information Science

Ben-Gurion University of the Negev

{baramit, bermann, naimani, hasona, rotemez}@post.bgu.ac.il

azencot@bgu.ac.il

## dSprites (Static) Results

Table 1: **M-Swap** on the **dSprites (Static)** dataset for **Sparse-AE**.

| Category   | Type           | Color            | Shape            | Posx             | Posy             | Scale speed      | Rotation speed   |
|------------|----------------|------------------|------------------|------------------|------------------|------------------|------------------|
| Uni-factor | Color          | $0.11 \pm 2e-03$ | $0.33 \pm 3e-03$ | $0.12 \pm 1e-03$ | $0.13 \pm 5e-03$ | $0.17 \pm 1e-03$ | $0.33 \pm 4e-03$ |
|            | Shape          | $0.11 \pm 5e-03$ | $0.33 \pm 4e-03$ | $0.12 \pm 2e-03$ | $0.13 \pm 5e-03$ | $0.17 \pm 8e-04$ | $0.33 \pm 4e-03$ |
|            | Posx           | $0.11 \pm 4e-03$ | $0.33 \pm 4e-03$ | $0.12 \pm 4e-03$ | $0.13 \pm 3e-03$ | $0.17 \pm 9e-04$ | $0.33 \pm 1e-02$ |
|            | Posy           | $0.11 \pm 6e-03$ | $0.33 \pm 2e-03$ | $0.12 \pm 1e-03$ | $0.13 \pm 3e-03$ | $0.17 \pm 5e-04$ | $0.33 \pm 4e-03$ |
|            | Scale speed    | $0.11 \pm 4e-03$ | $0.33 \pm 4e-03$ | $0.12 \pm 4e-03$ | $0.13 \pm 5e-03$ | $0.17 \pm 7e-04$ | $0.33 \pm 8e-03$ |
|            | Rotation speed | $0.11 \pm 7e-03$ | $0.33 \pm 1e-03$ | $0.12 \pm 4e-03$ | $0.13 \pm 3e-03$ | $0.17 \pm 1e-03$ | $0.33 \pm 8e-03$ |
| Two-factor | Dynamic        | $0.11 \pm 3e-03$ | $0.33 \pm 3e-03$ | $0.12 \pm 3e-03$ | $0.13 \pm 3e-03$ | $0.17 \pm 6e-04$ | $0.33 \pm 6e-03$ |
|            | Static         | $0.11 \pm 8e-03$ | $0.33 \pm 2e-03$ | $0.12 \pm 3e-03$ | $0.13 \pm 3e-03$ | $0.17 \pm 4e-04$ | $0.33 \pm 8e-03$ |

Table 2: **M-Swap** on the **dSprites (Static)** dataset for **VAE**.

| Category   | Type           | Color            | Shape            | Posx             | Posy             | Scale speed      | Rotation speed   |
|------------|----------------|------------------|------------------|------------------|------------------|------------------|------------------|
| Uni-factor | Color          | $0.10 \pm 5e-04$ | $0.33 \pm 7e-04$ | $0.13 \pm 7e-04$ | $0.13 \pm 1e-03$ | $0.17 \pm 3e-03$ | $0.32 \pm 1e-03$ |
|            | Shape          | $0.10 \pm 2e-03$ | $0.33 \pm 2e-03$ | $0.12 \pm 3e-04$ | $0.13 \pm 1e-03$ | $0.17 \pm 4e-03$ | $0.32 \pm 1e-03$ |
|            | Posx           | $0.10 \pm 1e-03$ | $0.33 \pm 1e-03$ | $0.12 \pm 2e-04$ | $0.13 \pm 2e-03$ | $0.17 \pm 2e-03$ | $0.32 \pm 1e-03$ |
|            | Posy           | $0.10 \pm 5e-04$ | $0.34 \pm 1e-03$ | $0.13 \pm 3e-04$ | $0.13 \pm 2e-04$ | $0.17 \pm 3e-03$ | $0.32 \pm 4e-04$ |
|            | Scale speed    | $0.10 \pm 8e-04$ | $0.33 \pm 2e-03$ | $0.13 \pm 6e-04$ | $0.13 \pm 8e-04$ | $0.17 \pm 4e-03$ | $0.32 \pm 1e-03$ |
|            | Rotation speed | $0.10 \pm 4e-04$ | $0.33 \pm 1e-03$ | $0.13 \pm 4e-04$ | $0.13 \pm 7e-04$ | $0.17 \pm 3e-03$ | $0.32 \pm 2e-03$ |
| Two-factor | Dynamic        | $0.10 \pm 1e-04$ | $0.33 \pm 1e-03$ | $0.13 \pm 8e-04$ | $0.13 \pm 9e-04$ | $0.17 \pm 3e-03$ | $0.32 \pm 7e-04$ |
|            | Static         | $0.10 \pm 5e-04$ | $0.33 \pm 1e-03$ | $0.13 \pm 2e-04$ | $0.13 \pm 5e-04$ | $0.17 \pm 2e-03$ | $0.32 \pm 2e-03$ |

---

\*Equal contribution

Table 3: **M-Swap** on the **dSprites (Static)** dataset for  $\beta$ -VAE.

| Category   | Type           | Color            | Shape            | Posx             | Posy             | Scale speed      | Rotation speed   |
|------------|----------------|------------------|------------------|------------------|------------------|------------------|------------------|
| Uni-factor | Color          | $0.34 \pm 7e-03$ | $0.35 \pm 4e-03$ | $0.15 \pm 6e-03$ | $0.15 \pm 5e-03$ | $0.18 \pm 6e-03$ | $0.35 \pm 2e-03$ |
|            | Shape          | $0.14 \pm 3e-03$ | $0.47 \pm 8e-03$ | $0.14 \pm 7e-03$ | $0.14 \pm 4e-03$ | $0.28 \pm 6e-03$ | $0.37 \pm 4e-03$ |
|            | Posx           | $0.15 \pm 4e-03$ | $0.35 \pm 1e-02$ | $0.22 \pm 4e-03$ | $0.19 \pm 6e-03$ | $0.18 \pm 2e-03$ | $0.35 \pm 3e-03$ |
|            | Posy           | $0.15 \pm 5e-03$ | $0.35 \pm 1e-02$ | $0.19 \pm 3e-03$ | $0.22 \pm 6e-03$ | $0.18 \pm 2e-03$ | $0.35 \pm 5e-03$ |
|            | Scale speed    | $0.14 \pm 3e-03$ | $0.35 \pm 1e-02$ | $0.14 \pm 8e-03$ | $0.14 \pm 4e-03$ | $0.26 \pm 7e-03$ | $0.34 \pm 4e-03$ |
|            | Rotation speed | $0.14 \pm 3e-03$ | $0.42 \pm 1e-02$ | $0.14 \pm 9e-03$ | $0.14 \pm 5e-03$ | $0.20 \pm 5e-03$ | $0.37 \pm 6e-03$ |
| Two-factor | Dynamic        | $0.14 \pm 2e-03$ | $0.43 \pm 7e-03$ | $0.14 \pm 5e-03$ | $0.15 \pm 9e-03$ | $0.30 \pm 7e-03$ | $0.38 \pm 7e-03$ |
|            | Static         | $0.87 \pm 1e-03$ | $0.53 \pm 6e-03$ | $0.80 \pm 1e-03$ | $0.75 \pm 2e-03$ | $0.31 \pm 6e-03$ | $0.42 \pm 5e-03$ |

Table 4: **M-Swap** on the **dSprites (Static)** dataset for MGP-VAE.

| Category   | Type           | Color            | Shape            | Posx             | Posy             | Scale speed      | Rotation speed   |
|------------|----------------|------------------|------------------|------------------|------------------|------------------|------------------|
| Uni-factor | Color          | $0.16 \pm 4e-03$ | $0.35 \pm 5e-03$ | $0.15 \pm 5e-03$ | $0.14 \pm 7e-03$ | $0.27 \pm 4e-03$ | $0.34 \pm 7e-03$ |
|            | Shape          | $0.14 \pm 4e-03$ | $0.59 \pm 7e-03$ | $0.28 \pm 5e-03$ | $0.15 \pm 6e-03$ | $0.30 \pm 6e-03$ | $0.41 \pm 5e-03$ |
|            | Posx           | $0.14 \pm 3e-03$ | $0.35 \pm 5e-03$ | $0.20 \pm 5e-03$ | $0.16 \pm 6e-03$ | $0.19 \pm 2e-03$ | $0.34 \pm 8e-03$ |
|            | Posy           | $0.19 \pm 3e-03$ | $0.38 \pm 7e-03$ | $0.18 \pm 6e-03$ | $0.73 \pm 3e-03$ | $0.19 \pm 4e-03$ | $0.39 \pm 7e-03$ |
|            | Scale speed    | $0.22 \pm 4e-03$ | $0.35 \pm 7e-03$ | $0.14 \pm 6e-03$ | $0.14 \pm 6e-03$ | $0.29 \pm 3e-03$ | $0.34 \pm 6e-03$ |
|            | Rotation speed | $1.11 \pm 0e+00$ | $1.33 \pm 0e+00$ | $1.12 \pm 0e+00$ | $1.12 \pm 0e+00$ | $1.17 \pm 0e+00$ | $0.00 \pm 0e+00$ |
| Two-factor | Dynamic        | $0.22 \pm 7e-03$ | $0.34 \pm 8e-03$ | $0.15 \pm 5e-03$ | $0.14 \pm 5e-03$ | $0.29 \pm 9e-03$ | $0.33 \pm 3e-03$ |
|            | Static         | $0.38 \pm 1e-02$ | $0.78 \pm 3e-03$ | $0.80 \pm 1e-03$ | $0.79 \pm 2e-03$ | $0.51 \pm 1e-03$ | $0.52 \pm 4e-03$ |

Table 5: **M-Swap** on the **dSprites (Static)** dataset for SKD.

| Category   | Type           | Color            | Shape            | Posx             | Posy             | Scale speed      | Rotation speed   |
|------------|----------------|------------------|------------------|------------------|------------------|------------------|------------------|
| Uni-factor | Color          | $0.19 \pm 1e-02$ | $0.34 \pm 6e-03$ | $0.18 \pm 8e-03$ | $0.13 \pm 7e-03$ | $0.18 \pm 4e-03$ | $0.34 \pm 1e-02$ |
|            | Shape          | $0.11 \pm 4e-03$ | $0.38 \pm 7e-03$ | $0.13 \pm 2e-03$ | $0.13 \pm 4e-03$ | $0.26 \pm 5e-03$ | $0.34 \pm 5e-03$ |
|            | Posx           | $0.21 \pm 4e-03$ | $0.34 \pm 6e-03$ | $0.26 \pm 6e-03$ | $0.19 \pm 8e-03$ | $0.18 \pm 5e-03$ | $0.35 \pm 1e-02$ |
|            | Posy           | $0.13 \pm 5e-03$ | $0.35 \pm 8e-03$ | $0.15 \pm 7e-03$ | $0.29 \pm 4e-03$ | $0.17 \pm 6e-03$ | $0.35 \pm 9e-03$ |
|            | Scale speed    | $0.11 \pm 5e-03$ | $0.41 \pm 1e-02$ | $0.13 \pm 3e-03$ | $0.13 \pm 3e-03$ | $0.46 \pm 1e-02$ | $0.34 \pm 6e-03$ |
|            | Rotation speed | $0.11 \pm 5e-03$ | $0.36 \pm 9e-03$ | $0.13 \pm 2e-03$ | $0.13 \pm 4e-03$ | $0.18 \pm 5e-03$ | $0.34 \pm 9e-03$ |
| Two-factor | Dynamic        | $0.12 \pm 7e-03$ | $0.45 \pm 7e-03$ | $0.13 \pm 5e-03$ | $0.14 \pm 5e-03$ | $0.48 \pm 1e-02$ | $0.36 \pm 9e-03$ |
|            | Static         | $0.84 \pm 8e-03$ | $0.63 \pm 7e-03$ | $0.80 \pm 3e-03$ | $0.79 \pm 3e-03$ | $0.31 \pm 1e-02$ | $0.65 \pm 1e-02$ |

Table 6: **M-Swap** on the **dSprites (Static)** dataset for SSM-SKD.

| Category   | Type           | Color            | Shape            | Posx             | Posy             | Scale speed      | Rotation speed   |
|------------|----------------|------------------|------------------|------------------|------------------|------------------|------------------|
| Uni-factor | Color          | $0.41 \pm 7e-03$ | $0.34 \pm 8e-03$ | $0.13 \pm 4e-03$ | $0.12 \pm 6e-03$ | $0.17 \pm 5e-03$ | $0.33 \pm 1e-02$ |
|            | Shape          | $0.12 \pm 7e-03$ | $0.37 \pm 5e-03$ | $0.13 \pm 4e-03$ | $0.13 \pm 4e-03$ | $0.18 \pm 5e-03$ | $0.33 \pm 1e-02$ |
|            | Posx           | $0.11 \pm 7e-03$ | $0.33 \pm 8e-03$ | $0.73 \pm 6e-03$ | $0.12 \pm 5e-03$ | $0.17 \pm 4e-03$ | $0.33 \pm 1e-02$ |
|            | Posy           | $0.12 \pm 7e-03$ | $0.36 \pm 1e-02$ | $0.13 \pm 4e-03$ | $0.67 \pm 3e-03$ | $0.18 \pm 3e-03$ | $0.34 \pm 1e-02$ |
|            | Scale speed    | $0.14 \pm 1e-02$ | $0.36 \pm 1e-02$ | $0.13 \pm 4e-03$ | $0.13 \pm 6e-03$ | $0.67 \pm 7e-03$ | $0.33 \pm 9e-03$ |
|            | Rotation speed | $0.12 \pm 8e-03$ | $0.45 \pm 8e-03$ | $0.13 \pm 3e-03$ | $0.14 \pm 8e-03$ | $0.17 \pm 2e-03$ | $0.58 \pm 1e-02$ |
| Two-factor | Dynamic        | $0.16 \pm 2e-02$ | $0.67 \pm 7e-03$ | $0.13 \pm 6e-03$ | $0.15 \pm 3e-03$ | $0.66 \pm 5e-03$ | $0.72 \pm 3e-03$ |
|            | Static         | $0.74 \pm 3e-02$ | $0.43 \pm 1e-02$ | $0.78 \pm 3e-03$ | $0.73 \pm 5e-03$ | $0.22 \pm 7e-03$ | $0.34 \pm 6e-03$ |

Table 7: **M-GSample** on the **dSprites (Static)** dataset for Sparse-AE.

| Category   | Type           | Color            | Shape            | Posx             | Posy             | Scale speed      | Rotation speed   |
|------------|----------------|------------------|------------------|------------------|------------------|------------------|------------------|
| Uni-factor | Color          | $0.11 \pm 8e-03$ | $0.33 \pm 2e-03$ | $0.12 \pm 3e-03$ | $0.13 \pm 1e-03$ | $0.17 \pm 6e-04$ | $0.33 \pm 6e-03$ |
|            | Shape          | $0.11 \pm 4e-03$ | $0.33 \pm 3e-03$ | $0.12 \pm 3e-03$ | $0.13 \pm 1e-03$ | $0.17 \pm 1e-04$ | $0.32 \pm 3e-03$ |
|            | Posx           | $0.11 \pm 4e-03$ | $0.33 \pm 2e-03$ | $0.12 \pm 4e-03$ | $0.13 \pm 6e-03$ | $0.17 \pm 7e-04$ | $0.33 \pm 7e-03$ |
|            | Posy           | $0.11 \pm 2e-03$ | $0.33 \pm 2e-03$ | $0.12 \pm 4e-03$ | $0.13 \pm 2e-03$ | $0.17 \pm 1e-03$ | $0.33 \pm 8e-03$ |
|            | Scale speed    | $0.11 \pm 4e-03$ | $0.33 \pm 9e-04$ | $0.12 \pm 2e-03$ | $0.13 \pm 3e-03$ | $0.17 \pm 5e-04$ | $0.33 \pm 7e-03$ |
|            | Rotation speed | $0.11 \pm 5e-03$ | $0.33 \pm 2e-03$ | $0.12 \pm 3e-03$ | $0.13 \pm 3e-03$ | $0.17 \pm 8e-04$ | $0.33 \pm 5e-03$ |
| Two-factor | Dynamic        | $0.11 \pm 3e-03$ | $0.33 \pm 4e-03$ | $0.12 \pm 2e-03$ | $0.13 \pm 2e-03$ | $0.17 \pm 6e-04$ | $0.33 \pm 8e-03$ |
|            | Static         | $0.11 \pm 2e-03$ | $0.33 \pm 2e-03$ | $0.12 \pm 2e-03$ | $0.13 \pm 2e-03$ | $0.17 \pm 6e-04$ | $0.33 \pm 6e-03$ |

Table 8: **M-GSample** on the **dSprites (Static)** dataset for **VAE**.

| Category   | Type           | Color            | Shape            | Posx             | Posy             | Scale speed      | Rotation speed   |
|------------|----------------|------------------|------------------|------------------|------------------|------------------|------------------|
| Uni-factor | Color          | $0.11 \pm 4e-03$ | $0.33 \pm 4e-03$ | $0.13 \pm 2e-03$ | $0.12 \pm 4e-03$ | $0.17 \pm 5e-03$ | $0.33 \pm 2e-03$ |
|            | Shape          | $0.11 \pm 2e-03$ | $0.33 \pm 2e-03$ | $0.13 \pm 1e-03$ | $0.13 \pm 6e-03$ | $0.17 \pm 3e-03$ | $0.33 \pm 4e-03$ |
|            | Posx           | $0.11 \pm 3e-03$ | $0.33 \pm 4e-03$ | $0.13 \pm 3e-03$ | $0.13 \pm 4e-03$ | $0.17 \pm 6e-03$ | $0.33 \pm 1e-03$ |
|            | Posy           | $0.11 \pm 1e-03$ | $0.33 \pm 7e-03$ | $0.13 \pm 1e-03$ | $0.13 \pm 4e-03$ | $0.17 \pm 4e-03$ | $0.33 \pm 2e-03$ |
|            | Scale speed    | $0.11 \pm 4e-03$ | $0.33 \pm 4e-03$ | $0.13 \pm 2e-03$ | $0.13 \pm 4e-03$ | $0.17 \pm 3e-03$ | $0.33 \pm 4e-03$ |
|            | Rotation speed | $0.11 \pm 4e-03$ | $0.33 \pm 6e-03$ | $0.12 \pm 2e-03$ | $0.13 \pm 4e-03$ | $0.17 \pm 3e-03$ | $0.33 \pm 3e-03$ |
| Two-factor | Dynamic        | $0.11 \pm 3e-03$ | $0.33 \pm 5e-03$ | $0.13 \pm 2e-03$ | $0.12 \pm 3e-03$ | $0.17 \pm 5e-03$ | $0.34 \pm 3e-03$ |
|            | Static         | $0.11 \pm 3e-03$ | $0.33 \pm 2e-03$ | $0.12 \pm 3e-03$ | $0.12 \pm 2e-03$ | $0.17 \pm 4e-03$ | $0.33 \pm 6e-03$ |

Table 9: **M-GSample** on the **dSprites (Static)** dataset for  $\beta$ -VAE.

| Category   | Type           | Color            | Shape            | Posx             | Posy             | Scale speed      | Rotation speed   |
|------------|----------------|------------------|------------------|------------------|------------------|------------------|------------------|
| Uni-factor | Color          | $0.36 \pm 5e-03$ | $0.34 \pm 3e-03$ | $0.14 \pm 5e-03$ | $0.14 \pm 3e-03$ | $0.16 \pm 5e-03$ | $0.33 \pm 6e-03$ |
|            | Shape          | $0.11 \pm 3e-03$ | $0.49 \pm 9e-03$ | $0.13 \pm 4e-03$ | $0.12 \pm 4e-03$ | $0.29 \pm 5e-03$ | $0.35 \pm 1e-02$ |
|            | Posx           | $0.13 \pm 5e-03$ | $0.34 \pm 8e-03$ | $0.20 \pm 5e-03$ | $0.18 \pm 5e-03$ | $0.16 \pm 5e-03$ | $0.33 \pm 8e-03$ |
|            | Posy           | $0.13 \pm 5e-03$ | $0.33 \pm 6e-03$ | $0.18 \pm 6e-03$ | $0.20 \pm 6e-03$ | $0.16 \pm 4e-03$ | $0.33 \pm 7e-03$ |
|            | Scale speed    | $0.11 \pm 5e-03$ | $0.34 \pm 4e-03$ | $0.13 \pm 6e-03$ | $0.12 \pm 4e-03$ | $0.26 \pm 6e-03$ | $0.34 \pm 9e-03$ |
|            | Rotation speed | $0.11 \pm 5e-03$ | $0.42 \pm 7e-03$ | $0.13 \pm 2e-03$ | $0.12 \pm 2e-03$ | $0.20 \pm 3e-03$ | $0.38 \pm 4e-03$ |
| Two-factor | Dynamic        | $0.11 \pm 3e-03$ | $0.42 \pm 9e-03$ | $0.12 \pm 5e-03$ | $0.13 \pm 4e-03$ | $0.31 \pm 4e-03$ | $0.38 \pm 7e-03$ |
|            | Static         | $0.87 \pm 2e-03$ | $0.54 \pm 8e-04$ | $0.80 \pm 2e-03$ | $0.76 \pm 3e-03$ | $0.31 \pm 3e-03$ | $0.42 \pm 5e-03$ |

Table 10: **M-GSample** on the **dSprites (Static)** dataset for **MGP-VAE**.

| Category   | Type           | Color            | Shape            | Posx             | Posy             | Scale speed      | Rotation speed   |
|------------|----------------|------------------|------------------|------------------|------------------|------------------|------------------|
| Uni-factor | Color          | $0.11 \pm 3e-03$ | $0.33 \pm 3e-03$ | $0.12 \pm 4e-03$ | $0.13 \pm 6e-03$ | $0.16 \pm 5e-03$ | $0.33 \pm 4e-03$ |
|            | Shape          | $0.11 \pm 7e-03$ | $0.33 \pm 5e-03$ | $0.12 \pm 5e-03$ | $0.13 \pm 6e-03$ | $0.16 \pm 8e-03$ | $0.33 \pm 7e-03$ |
|            | Posx           | $0.11 \pm 6e-03$ | $0.34 \pm 6e-03$ | $0.13 \pm 5e-03$ | $0.13 \pm 5e-03$ | $0.17 \pm 4e-03$ | $0.33 \pm 8e-03$ |
|            | Posy           | $0.11 \pm 5e-03$ | $0.33 \pm 4e-03$ | $0.13 \pm 3e-03$ | $0.14 \pm 2e-03$ | $0.16 \pm 4e-03$ | $0.33 \pm 6e-03$ |
|            | Scale speed    | $0.11 \pm 5e-03$ | $0.34 \pm 4e-03$ | $0.13 \pm 5e-03$ | $0.12 \pm 3e-03$ | $0.16 \pm 4e-03$ | $0.33 \pm 2e-03$ |
|            | Rotation speed | $1.11 \pm 0e+00$ | $1.33 \pm 0e+00$ | $1.12 \pm 0e+00$ | $1.12 \pm 0e+00$ | $1.17 \pm 0e+00$ | $0.00 \pm 0e+00$ |
| Two-factor | Dynamic        | $0.11 \pm 4e-03$ | $0.34 \pm 3e-03$ | $0.13 \pm 4e-03$ | $0.13 \pm 2e-03$ | $0.16 \pm 4e-03$ | $0.33 \pm 5e-03$ |
|            | Static         | $0.15 \pm 4e-03$ | $0.38 \pm 7e-03$ | $0.48 \pm 3e-03$ | $0.48 \pm 5e-03$ | $0.26 \pm 6e-03$ | $0.37 \pm 5e-03$ |

Table 11: **M-GSample** on the **dSprites (Static)** dataset for **SKD**.

| Category   | Type           | Color            | Shape            | Posx             | Posy             | Scale speed      | Rotation speed   |
|------------|----------------|------------------|------------------|------------------|------------------|------------------|------------------|
| Uni-factor | Color          | $0.21 \pm 6e-03$ | $0.34 \pm 7e-03$ | $0.19 \pm 9e-03$ | $0.14 \pm 9e-03$ | $0.18 \pm 6e-03$ | $0.34 \pm 7e-03$ |
|            | Shape          | $0.12 \pm 4e-03$ | $0.38 \pm 1e-02$ | $0.13 \pm 5e-03$ | $0.13 \pm 4e-03$ | $0.28 \pm 7e-03$ | $0.35 \pm 3e-03$ |
|            | Posx           | $0.23 \pm 6e-03$ | $0.34 \pm 7e-03$ | $0.27 \pm 7e-03$ | $0.21 \pm 6e-03$ | $0.18 \pm 5e-03$ | $0.35 \pm 7e-03$ |
|            | Posy           | $0.14 \pm 4e-03$ | $0.36 \pm 5e-03$ | $0.16 \pm 4e-03$ | $0.33 \pm 5e-03$ | $0.18 \pm 3e-03$ | $0.36 \pm 7e-03$ |
|            | Scale speed    | $0.12 \pm 3e-03$ | $0.43 \pm 9e-03$ | $0.13 \pm 4e-03$ | $0.13 \pm 3e-03$ | $0.50 \pm 5e-03$ | $0.36 \pm 1e-02$ |
|            | Rotation speed | $0.12 \pm 6e-03$ | $0.36 \pm 1e-02$ | $0.13 \pm 1e-03$ | $0.14 \pm 5e-03$ | $0.19 \pm 3e-03$ | $0.35 \pm 6e-03$ |
| Two-factor | Dynamic        | $0.13 \pm 3e-03$ | $0.47 \pm 9e-03$ | $0.13 \pm 8e-03$ | $0.14 \pm 7e-03$ | $0.53 \pm 6e-03$ | $0.38 \pm 7e-03$ |
|            | Static         | $0.84 \pm 1e-02$ | $0.65 \pm 4e-03$ | $0.80 \pm 2e-03$ | $0.79 \pm 2e-03$ | $0.32 \pm 5e-03$ | $0.67 \pm 1e-02$ |

Table 12: **M-GSample** on the **dSprites (Static)** dataset for **SSM-SKD**.

| Category   | Type           | Color            | Shape            | Posx             | Posy             | Scale speed      | Rotation speed   |
|------------|----------------|------------------|------------------|------------------|------------------|------------------|------------------|
| Uni-factor | Color          | $0.44 \pm 1e-02$ | $0.34 \pm 5e-03$ | $0.13 \pm 4e-03$ | $0.13 \pm 3e-03$ | $0.17 \pm 5e-03$ | $0.33 \pm 8e-03$ |
|            | Shape          | $0.13 \pm 2e-03$ | $0.42 \pm 1e-02$ | $0.12 \pm 4e-03$ | $0.14 \pm 3e-03$ | $0.19 \pm 4e-03$ | $0.34 \pm 5e-03$ |
|            | Posx           | $0.13 \pm 4e-03$ | $0.33 \pm 1e-02$ | $0.76 \pm 5e-03$ | $0.13 \pm 3e-03$ | $0.17 \pm 5e-03$ | $0.34 \pm 4e-03$ |
|            | Posy           | $0.14 \pm 1e-03$ | $0.38 \pm 6e-03$ | $0.13 \pm 2e-03$ | $0.69 \pm 3e-03$ | $0.19 \pm 6e-03$ | $0.35 \pm 9e-03$ |
|            | Scale speed    | $0.18 \pm 1e-02$ | $0.40 \pm 5e-03$ | $0.13 \pm 4e-03$ | $0.13 \pm 3e-03$ | $0.69 \pm 4e-03$ | $0.35 \pm 8e-03$ |
|            | Rotation speed | $0.12 \pm 4e-03$ | $0.51 \pm 7e-03$ | $0.13 \pm 3e-03$ | $0.15 \pm 4e-03$ | $0.18 \pm 6e-03$ | $0.65 \pm 9e-03$ |
| Two-factor | Dynamic        | $0.20 \pm 6e-03$ | $0.71 \pm 9e-03$ | $0.12 \pm 6e-03$ | $0.16 \pm 8e-03$ | $0.71 \pm 1e-02$ | $0.76 \pm 5e-03$ |
|            | Static         | $0.76 \pm 2e-02$ | $0.50 \pm 7e-03$ | $0.79 \pm 3e-03$ | $0.74 \pm 2e-03$ | $0.23 \pm 4e-03$ | $0.37 \pm 6e-03$ |

Table 13: **DCI** on the **dSprites (Static)** dataset for **Sparse-AE**.

| <b>None</b>    | DCI-M $\uparrow$ | DCI-C $\uparrow$ | DCI-E $\uparrow$ |
|----------------|------------------|------------------|------------------|
| Color          | $0.00 \pm 2e-03$ | $0.68 \pm 1e-03$ | $0.11 \pm 1e-02$ |
| Shape          | $0.00 \pm 5e-04$ | $0.68 \pm 4e-04$ | $0.33 \pm 1e-02$ |
| Posx           | $0.00 \pm 5e-04$ | $0.68 \pm 1e-03$ | $0.13 \pm 7e-03$ |
| Posy           | $0.00 \pm 4e-04$ | $0.68 \pm 5e-04$ | $0.12 \pm 9e-03$ |
| Scale speed    | $0.00 \pm 4e-04$ | $0.68 \pm 1e-03$ | $0.17 \pm 1e-02$ |
| Rotation speed | $0.00 \pm 5e-04$ | $0.68 \pm 5e-04$ | $0.34 \pm 2e-02$ |

Table 14: **DCI** on the **dSprites (Static)** dataset for **VAE**.

| <b>None</b>    | DCI-M $\uparrow$ | DCI-C $\uparrow$ | DCI-E $\uparrow$ |
|----------------|------------------|------------------|------------------|
| Color          | $0.00 \pm 1e-03$ | $0.68 \pm 1e-03$ | $0.11 \pm 5e-03$ |
| Shape          | $0.00 \pm 2e-04$ | $0.68 \pm 2e-03$ | $0.33 \pm 2e-02$ |
| Posx           | $0.00 \pm 2e-03$ | $0.68 \pm 1e-03$ | $0.14 \pm 2e-02$ |
| Posy           | $0.00 \pm 1e-03$ | $0.68 \pm 8e-04$ | $0.12 \pm 1e-02$ |
| Scale speed    | $0.00 \pm 6e-04$ | $0.68 \pm 1e-03$ | $0.18 \pm 2e-02$ |
| Rotation speed | $0.00 \pm 2e-04$ | $0.69 \pm 2e-03$ | $0.34 \pm 2e-02$ |

Table 15: **DCI** on the **dSprites (Static)** dataset for  $\beta$ -**VAE**.

| <b>None</b>    | DCI-M $\uparrow$ | DCI-C $\uparrow$ | DCI-E $\uparrow$ |
|----------------|------------------|------------------|------------------|
| Color          | $0.26 \pm 4e-03$ | $0.79 \pm 1e-03$ | $0.66 \pm 1e-02$ |
| Shape          | $0.36 \pm 5e-03$ | $0.77 \pm 3e-03$ | $0.82 \pm 8e-03$ |
| Posx           | $0.25 \pm 1e-02$ | $0.76 \pm 7e-04$ | $0.67 \pm 2e-02$ |
| Posy           | $0.21 \pm 9e-03$ | $0.76 \pm 2e-03$ | $0.64 \pm 9e-03$ |
| Scale speed    | $0.34 \pm 1e-02$ | $0.74 \pm 1e-03$ | $0.79 \pm 6e-03$ |
| Rotation speed | $0.10 \pm 4e-03$ | $0.74 \pm 5e-03$ | $0.59 \pm 2e-02$ |

Table 16: **DCI** on the **dSprites (Static)** dataset for **MGP-VAE**.

| <b>None</b>    | DCI-M $\uparrow$ | DCI-C $\uparrow$ | DCI-E $\uparrow$ |
|----------------|------------------|------------------|------------------|
| Color          | $0.10 \pm 5e-03$ | $0.43 \pm 5e-03$ | $0.39 \pm 1e-02$ |
| Shape          | $0.12 \pm 5e-03$ | $0.48 \pm 2e-02$ | $0.47 \pm 1e-02$ |
| Posx           | $0.04 \pm 2e-03$ | $0.39 \pm 3e-03$ | $0.22 \pm 9e-03$ |
| Posy           | $0.05 \pm 3e-03$ | $0.43 \pm 6e-03$ | $0.20 \pm 2e-02$ |
| Scale speed    | $0.13 \pm 5e-03$ | $0.50 \pm 7e-03$ | $0.36 \pm 5e-03$ |
| Rotation speed | nan              | $0.41 \pm 8e-03$ | $0.40 \pm 2e-02$ |

Table 17: **DCI** on the **dSprites (Static)** dataset for **SKD**.

| <b>None</b>    | DCI-M $\uparrow$ | DCI-C $\uparrow$ | DCI-E $\uparrow$ |
|----------------|------------------|------------------|------------------|
| Color          | $0.14 \pm 7e-04$ | $0.56 \pm 2e-03$ | $0.72 \pm 7e-04$ |
| Shape          | $0.11 \pm 3e-03$ | $0.58 \pm 2e-03$ | $0.68 \pm 5e-04$ |
| Posx           | $0.10 \pm 6e-04$ | $0.56 \pm 6e-04$ | $0.67 \pm 7e-04$ |
| Posy           | $0.06 \pm 2e-04$ | $0.60 \pm 3e-03$ | $0.70 \pm 9e-04$ |
| Scale speed    | $0.11 \pm 1e-02$ | $0.55 \pm 9e-04$ | $0.31 \pm 1e-03$ |
| Rotation speed | $0.06 \pm 2e-03$ | $0.56 \pm 4e-03$ | $0.44 \pm 4e-03$ |

Table 18: **DCI** on the **dSprites (Static)** dataset for **SSM-SKD**.

| <b>None</b>    | DCI-M $\uparrow$ | DCI-C $\uparrow$ | DCI-E $\uparrow$ |
|----------------|------------------|------------------|------------------|
| Color          | $0.70 \pm 6e-03$ | $0.95 \pm 5e-03$ | $1.00 \pm 0e+00$ |
| Shape          | $0.48 \pm 6e-04$ | $0.85 \pm 5e-04$ | $0.98 \pm 7e-04$ |
| Posx           | $0.84 \pm 9e-03$ | $0.87 \pm 2e-03$ | $0.92 \pm 5e-04$ |
| Posy           | $0.84 \pm 8e-04$ | $0.90 \pm 4e-04$ | $0.97 \pm 0e+00$ |
| Scale speed    | $0.66 \pm 1e-02$ | $0.77 \pm 1e-03$ | $0.97 \pm 0e+00$ |
| Rotation speed | $0.65 \pm 5e-04$ | $0.79 \pm 2e-04$ | $0.84 \pm 1e-03$ |

Table 19: **Consistency** on the **dSprites (Static)** dataset for **Sparse-AE**.

| Category             | Type  | Shape            | Color            | Posx             | Posy             |
|----------------------|-------|------------------|------------------|------------------|------------------|
| C-Swap $\uparrow$    | Shape | $0.33 \pm 1e-03$ | $0.11 \pm 2e-03$ | $0.12 \pm 3e-03$ | $0.13 \pm 2e-03$ |
|                      | Color | $0.33 \pm 2e-03$ | $0.11 \pm 2e-03$ | $0.12 \pm 1e-03$ | $0.13 \pm 4e-03$ |
|                      | Posx  | $0.33 \pm 3e-03$ | $0.11 \pm 4e-03$ | $0.13 \pm 2e-03$ | $0.13 \pm 2e-03$ |
|                      | Posy  | $0.33 \pm 3e-03$ | $0.11 \pm 3e-03$ | $0.13 \pm 2e-03$ | $0.13 \pm 2e-03$ |
| C-Sample $\uparrow$  | Shape | $0.84 \pm 6e-03$ | $0.82 \pm 2e-03$ | $0.65 \pm 3e-03$ | $0.62 \pm 4e-03$ |
|                      | Color | $0.87 \pm 2e-03$ | $0.78 \pm 2e-03$ | $0.75 \pm 2e-03$ | $0.70 \pm 2e-03$ |
|                      | Posx  | $0.88 \pm 4e-03$ | $0.79 \pm 4e-03$ | $0.70 \pm 3e-03$ | $0.68 \pm 3e-03$ |
|                      | Posy  | $0.86 \pm 1e-03$ | $0.77 \pm 2e-03$ | $0.70 \pm 3e-03$ | $0.66 \pm 2e-03$ |
| GC-Sample $\uparrow$ | Shape | $0.88 \pm 4e-03$ | $0.84 \pm 3e-03$ | $0.72 \pm 4e-03$ | $0.70 \pm 5e-03$ |
|                      | Color | $0.90 \pm 3e-03$ | $0.83 \pm 3e-03$ | $0.81 \pm 2e-03$ | $0.78 \pm 2e-03$ |
|                      | Posx  | $0.91 \pm 4e-03$ | $0.84 \pm 4e-03$ | $0.76 \pm 2e-03$ | $0.77 \pm 6e-03$ |
|                      | Posy  | $0.90 \pm 3e-03$ | $0.83 \pm 2e-03$ | $0.75 \pm 2e-03$ | $0.75 \pm 2e-03$ |

Table 20: **Consistency** on the **dSprites (Static)** dataset for **VAE**.

| Category             | Type  | Posx             | Shape            | Posy             | Color            |
|----------------------|-------|------------------|------------------|------------------|------------------|
| C-Swap $\uparrow$    | Posx  | $0.12 \pm 1e-03$ | $0.33 \pm 9e-04$ | $0.13 \pm 1e-03$ | $0.11 \pm 9e-04$ |
|                      | Shape | $0.12 \pm 1e-03$ | $0.33 \pm 2e-03$ | $0.13 \pm 1e-03$ | $0.11 \pm 2e-04$ |
|                      | Posy  | $0.12 \pm 6e-04$ | $0.33 \pm 1e-03$ | $0.13 \pm 9e-04$ | $0.11 \pm 8e-04$ |
|                      | Color | $0.12 \pm 1e-03$ | $0.33 \pm 1e-03$ | $0.13 \pm 8e-04$ | $0.11 \pm 4e-04$ |
| C-Sample $\uparrow$  | Posx  | $0.64 \pm 5e-03$ | $0.96 \pm 3e-03$ | $0.85 \pm 7e-03$ | $0.95 \pm 6e-03$ |
|                      | Shape | $0.64 \pm 8e-03$ | $0.96 \pm 5e-03$ | $0.86 \pm 1e-02$ | $0.95 \pm 5e-03$ |
|                      | Posy  | $0.65 \pm 5e-03$ | $0.96 \pm 3e-03$ | $0.85 \pm 3e-03$ | $0.95 \pm 5e-03$ |
|                      | Color | $0.64 \pm 2e-03$ | $0.96 \pm 6e-03$ | $0.86 \pm 5e-03$ | $0.95 \pm 3e-03$ |
| GC-Sample $\uparrow$ | Posx  | $0.88 \pm 1e-03$ | $0.97 \pm 2e-03$ | $0.88 \pm 8e-03$ | $0.96 \pm 9e-04$ |
|                      | Shape | $0.88 \pm 3e-03$ | $0.97 \pm 4e-03$ | $0.89 \pm 9e-03$ | $0.96 \pm 3e-03$ |
|                      | Posy  | $0.88 \pm 2e-03$ | $0.97 \pm 4e-03$ | $0.89 \pm 8e-03$ | $0.96 \pm 3e-03$ |
|                      | Color | $0.88 \pm 2e-03$ | $0.97 \pm 4e-03$ | $0.88 \pm 9e-03$ | $0.96 \pm 5e-03$ |

Table 21: **Consistency** on the **dSprites (Static)** dataset for  $\beta$ -VAE.

| Category             | Type  | Posx             | Color            | Posy             | Shape            |
|----------------------|-------|------------------|------------------|------------------|------------------|
| C-Swap $\uparrow$    | Posx  | $0.22 \pm 4e-03$ | $0.54 \pm 9e-03$ | $0.24 \pm 1e-02$ | $0.79 \pm 3e-03$ |
|                      | Color | $0.62 \pm 4e-03$ | $0.34 \pm 4e-03$ | $0.58 \pm 7e-03$ | $0.76 \pm 3e-03$ |
|                      | Posy  | $0.24 \pm 2e-03$ | $0.55 \pm 4e-03$ | $0.21 \pm 5e-03$ | $0.78 \pm 3e-03$ |
|                      | Shape | $0.80 \pm 2e-03$ | $0.87 \pm 2e-03$ | $0.77 \pm 2e-03$ | $0.47 \pm 1e-02$ |
| C-Sample $\uparrow$  | Posx  | $0.98 \pm 2e-03$ | $0.99 \pm 1e-03$ | $0.98 \pm 1e-03$ | $0.99 \pm 1e-03$ |
|                      | Color | $0.96 \pm 3e-03$ | $0.99 \pm 1e-03$ | $0.96 \pm 2e-03$ | $0.99 \pm 7e-04$ |
|                      | Posy  | $0.98 \pm 2e-03$ | $0.99 \pm 7e-04$ | $0.98 \pm 1e-03$ | $0.99 \pm 8e-04$ |
|                      | Shape | $0.97 \pm 2e-03$ | $0.99 \pm 8e-04$ | $0.98 \pm 2e-03$ | $0.99 \pm 5e-04$ |
| GC-Sample $\uparrow$ | Posx  | $0.98 \pm 5e-04$ | $0.99 \pm 7e-04$ | $0.99 \pm 1e-03$ | $0.99 \pm 3e-04$ |
|                      | Color | $0.97 \pm 2e-03$ | $0.99 \pm 2e-04$ | $0.97 \pm 3e-03$ | $0.99 \pm 5e-04$ |
|                      | Posy  | $0.98 \pm 1e-03$ | $0.99 \pm 6e-04$ | $0.99 \pm 9e-04$ | $0.99 \pm 8e-04$ |
|                      | Shape | $0.98 \pm 2e-03$ | $0.99 \pm 8e-04$ | $0.99 \pm 1e-03$ | $0.99 \pm 7e-04$ |

Table 22: **Consistency** on the **dSprites (Static)** dataset for **MGP-VAE**.

| Category             | Type  | Posy             | Shape            | Posx             | Color            |
|----------------------|-------|------------------|------------------|------------------|------------------|
| C-Swap $\uparrow$    | Posy  | $0.73 \pm 4e-03$ | $0.64 \pm 4e-03$ | $0.48 \pm 6e-03$ | $0.58 \pm 1e-02$ |
|                      | Shape | $0.80 \pm 1e-03$ | $0.58 \pm 6e-03$ | $0.31 \pm 6e-03$ | $0.73 \pm 4e-03$ |
|                      | Posx  | $0.75 \pm 4e-03$ | $0.70 \pm 5e-03$ | $0.19 \pm 7e-03$ | $0.72 \pm 6e-03$ |
|                      | Color | $0.79 \pm 2e-03$ | $0.78 \pm 1e-03$ | $0.80 \pm 2e-03$ | $0.17 \pm 5e-03$ |
| C-Sample $\uparrow$  | Posy  | $0.61 \pm 4e-03$ | $0.98 \pm 2e-03$ | $0.62 \pm 3e-03$ | $0.70 \pm 3e-03$ |
|                      | Shape | $0.61 \pm 2e-03$ | $0.97 \pm 2e-03$ | $0.62 \pm 2e-03$ | $0.69 \pm 5e-03$ |
|                      | Posx  | $0.60 \pm 1e-03$ | $0.97 \pm 2e-03$ | $0.62 \pm 3e-03$ | $0.67 \pm 5e-03$ |
|                      | Color | $0.61 \pm 3e-03$ | $0.97 \pm 2e-03$ | $0.62 \pm 4e-03$ | $0.69 \pm 4e-03$ |
| GC-Sample $\uparrow$ | Posy  | $0.60 \pm 5e-03$ | $0.98 \pm 1e-03$ | $0.63 \pm 3e-03$ | $0.66 \pm 3e-03$ |
|                      | Shape | $0.61 \pm 5e-03$ | $0.98 \pm 2e-03$ | $0.63 \pm 5e-03$ | $0.65 \pm 4e-03$ |
|                      | Posx  | $0.60 \pm 6e-03$ | $0.97 \pm 7e-04$ | $0.62 \pm 3e-03$ | $0.64 \pm 3e-03$ |
|                      | Color | $0.60 \pm 4e-03$ | $0.97 \pm 3e-03$ | $0.62 \pm 3e-03$ | $0.66 \pm 6e-03$ |

Table 23: **Consistency on the dSprites (Static) dataset for SKD.**

| Category             | Type  | Color            | Posy             | Shape            | Posx             |
|----------------------|-------|------------------|------------------|------------------|------------------|
| C-Swap $\uparrow$    | Color | $0.21 \pm 2e-03$ | $0.51 \pm 6e-03$ | $0.60 \pm 4e-03$ | $0.43 \pm 6e-03$ |
|                      | Posy  | $0.63 \pm 7e-03$ | $0.29 \pm 5e-03$ | $0.53 \pm 5e-03$ | $0.55 \pm 2e-03$ |
|                      | Shape | $0.88 \pm 2e-03$ | $0.80 \pm 1e-03$ | $0.38 \pm 1e-02$ | $0.80 \pm 1e-03$ |
|                      | Posx  | $0.29 \pm 5e-03$ | $0.34 \pm 7e-03$ | $0.53 \pm 5e-03$ | $0.25 \pm 8e-03$ |
| C-Sample $\uparrow$  | Color | $0.92 \pm 1e-03$ | $0.89 \pm 2e-03$ | $0.92 \pm 2e-03$ | $0.89 \pm 2e-03$ |
|                      | Posy  | $0.93 \pm 3e-03$ | $0.91 \pm 2e-03$ | $0.92 \pm 2e-03$ | $0.90 \pm 2e-03$ |
|                      | Shape | $0.94 \pm 1e-03$ | $0.93 \pm 1e-03$ | $0.93 \pm 1e-03$ | $0.92 \pm 2e-03$ |
|                      | Posx  | $0.91 \pm 4e-03$ | $0.89 \pm 2e-03$ | $0.91 \pm 1e-03$ | $0.89 \pm 2e-03$ |
| GC-Sample $\uparrow$ | Color | $0.93 \pm 3e-03$ | $0.91 \pm 2e-03$ | $0.93 \pm 2e-03$ | $0.91 \pm 1e-03$ |
|                      | Posy  | $0.94 \pm 2e-03$ | $0.92 \pm 2e-03$ | $0.93 \pm 2e-03$ | $0.91 \pm 1e-03$ |
|                      | Shape | $0.95 \pm 1e-03$ | $0.94 \pm 3e-03$ | $0.94 \pm 1e-03$ | $0.93 \pm 2e-03$ |
|                      | Posx  | $0.93 \pm 3e-03$ | $0.91 \pm 9e-04$ | $0.93 \pm 1e-03$ | $0.91 \pm 3e-04$ |

Table 24: **Consistency on the dSprites (Static) dataset for SSM-SKD.**

| Category             | Type  | Color            | Posy             | Posx             | Shape            |
|----------------------|-------|------------------|------------------|------------------|------------------|
| C-Swap $\uparrow$    | Color | $0.40 \pm 8e-03$ | $0.80 \pm 1e-03$ | $0.79 \pm 9e-04$ | $0.85 \pm 2e-03$ |
|                      | Posy  | $0.83 \pm 3e-03$ | $0.68 \pm 3e-03$ | $0.80 \pm 2e-03$ | $0.80 \pm 4e-03$ |
|                      | Posx  | $0.89 \pm 4e-03$ | $0.80 \pm 1e-03$ | $0.70 \pm 3e-03$ | $0.84 \pm 4e-04$ |
|                      | Shape | $0.88 \pm 2e-03$ | $0.76 \pm 3e-03$ | $0.80 \pm 1e-03$ | $0.37 \pm 6e-03$ |
| C-Sample $\uparrow$  | Color | $0.96 \pm 2e-03$ | $0.93 \pm 4e-03$ | $0.93 \pm 5e-03$ | $0.95 \pm 2e-03$ |
|                      | Posy  | $0.96 \pm 2e-03$ | $0.94 \pm 1e-03$ | $0.93 \pm 3e-03$ | $0.93 \pm 3e-03$ |
|                      | Posx  | $0.97 \pm 1e-03$ | $0.95 \pm 3e-03$ | $0.92 \pm 7e-04$ | $0.96 \pm 1e-03$ |
|                      | Shape | $0.96 \pm 2e-03$ | $0.93 \pm 2e-03$ | $0.94 \pm 3e-03$ | $0.94 \pm 8e-04$ |
| GC-Sample $\uparrow$ | Color | $0.97 \pm 1e-03$ | $0.95 \pm 2e-03$ | $0.94 \pm 4e-03$ | $0.96 \pm 1e-03$ |
|                      | Posy  | $0.97 \pm 2e-03$ | $0.95 \pm 1e-03$ | $0.95 \pm 3e-03$ | $0.94 \pm 3e-03$ |
|                      | Posx  | $0.97 \pm 6e-04$ | $0.95 \pm 1e-03$ | $0.94 \pm 9e-04$ | $0.96 \pm 2e-03$ |
|                      | Shape | $0.97 \pm 1e-03$ | $0.94 \pm 2e-03$ | $0.95 \pm 3e-03$ | $0.95 \pm 2e-03$ |
