# Supplementary material
Source: ML conference proceedings conference paper supplement (https://openreview.net/forum?id=QccMOjE05b)
Supplement: supplementary_material [file sprites.pdf › sprites.pdf]

---

# Disentanglement Beyond Static vs. Dynamic: A Benchmark and Evaluation Framework for Multi-Factor Sequential Representations

---

Tal Barami\* Nimrod Berman\* Ilan Naiman\* Amos H. Hason Rotem Ezra Omri Azencot

Faculty of Computer and Information Science

Ben-Gurion University of the Negev

{baramit, bermann, naimani, hasona, rotomez}@post.bgu.ac.il

azencot@bgu.ac.il

## Sprites Results

Table 1: **M-Swap** on the **Sprites** dataset for **Sparse-AE**.

| Category   | Type     | Movement         | Body             | Bottom           | Top              | Hair             |
|------------|----------|------------------|------------------|------------------|------------------|------------------|
| Uni-factor | Movement | $0.99 \pm 2e-03$ | $0.20 \pm 1e-02$ | $0.28 \pm 8e-03$ | $0.93 \pm 2e-03$ | $0.19 \pm 1e-02$ |
|            | Body     | $0.14 \pm 1e-02$ | $0.39 \pm 1e-02$ | $0.18 \pm 7e-03$ | $0.20 \pm 6e-03$ | $0.21 \pm 8e-03$ |
|            | Bottom   | $0.14 \pm 1e-02$ | $0.20 \pm 1e-02$ | $0.18 \pm 1e-02$ | $0.20 \pm 6e-03$ | $0.21 \pm 8e-03$ |
|            | Top      | $0.14 \pm 1e-02$ | $0.18 \pm 1e-02$ | $0.17 \pm 1e-02$ | $0.20 \pm 5e-03$ | $0.21 \pm 8e-03$ |
|            | Hair     | $0.14 \pm 1e-02$ | $0.21 \pm 1e-02$ | $0.23 \pm 6e-03$ | $0.20 \pm 6e-03$ | $0.52 \pm 1e-02$ |
| Two-factor | Dynamic  | $0.99 \pm 2e-03$ | $0.20 \pm 5e-03$ | $0.28 \pm 1e-02$ | $0.93 \pm 4e-03$ | $0.19 \pm 1e-02$ |
|            | Static   | $0.14 \pm 7e-03$ | $0.47 \pm 1e-02$ | $0.25 \pm 8e-03$ | $0.20 \pm 8e-03$ | $0.53 \pm 7e-03$ |

Table 2: **M-Swap** on the **Sprites** dataset for **VAE**.

| Category   | Type     | Movement         | Body             | Bottom           | Top              | Hair             |
|------------|----------|------------------|------------------|------------------|------------------|------------------|
| Uni-factor | Movement | $0.82 \pm 1e-02$ | $0.16 \pm 5e-03$ | $0.16 \pm 7e-03$ | $0.18 \pm 4e-03$ | $0.17 \pm 2e-03$ |
|            | Body     | $0.14 \pm 1e-02$ | $0.17 \pm 3e-03$ | $0.16 \pm 5e-03$ | $0.18 \pm 7e-03$ | $0.17 \pm 1e-02$ |
|            | Bottom   | $0.14 \pm 1e-02$ | $0.16 \pm 6e-03$ | $0.16 \pm 5e-03$ | $0.18 \pm 6e-03$ | $0.17 \pm 1e-02$ |
|            | Top      | $0.14 \pm 1e-02$ | $0.16 \pm 4e-03$ | $0.16 \pm 4e-03$ | $0.18 \pm 6e-03$ | $0.17 \pm 1e-02$ |
|            | Hair     | $0.14 \pm 1e-02$ | $0.17 \pm 3e-03$ | $0.16 \pm 4e-03$ | $0.18 \pm 7e-03$ | $0.17 \pm 1e-02$ |
| Two-factor | Dynamic  | $0.82 \pm 1e-02$ | $0.16 \pm 6e-03$ | $0.16 \pm 8e-03$ | $0.18 \pm 8e-03$ | $0.18 \pm 6e-03$ |
|            | Static   | $0.23 \pm 3e-03$ | $0.17 \pm 6e-03$ | $0.16 \pm 1e-02$ | $0.18 \pm 1e-02$ | $0.17 \pm 1e-02$ |

---

\*Equal contribution

Table 3: **M-Swap** on the **Sprites** dataset for  $\beta$ -VAE.

| Category   | Type     | Movement         | Body             | Bottom           | Top              | Hair             |
|------------|----------|------------------|------------------|------------------|------------------|------------------|
| Uni-factor | Movement | $1.00 \pm 7e-04$ | $0.16 \pm 8e-04$ | $0.16 \pm 1e-03$ | $0.18 \pm 2e-03$ | $0.17 \pm 2e-03$ |
|            | Body     | $0.14 \pm 1e-02$ | $0.17 \pm 7e-03$ | $0.16 \pm 9e-03$ | $0.18 \pm 1e-02$ | $0.16 \pm 4e-03$ |
|            | Bottom   | $0.14 \pm 1e-02$ | $0.17 \pm 7e-03$ | $0.16 \pm 9e-03$ | $0.18 \pm 2e-02$ | $0.16 \pm 4e-03$ |
|            | Top      | $0.14 \pm 1e-02$ | $0.17 \pm 7e-03$ | $0.16 \pm 9e-03$ | $0.18 \pm 2e-02$ | $0.16 \pm 5e-03$ |
|            | Hair     | $0.14 \pm 1e-02$ | $0.17 \pm 6e-03$ | $0.16 \pm 1e-02$ | $0.18 \pm 2e-02$ | $0.16 \pm 4e-03$ |
| Two-factor | Dynamic  | $1.00 \pm 1e-03$ | $0.16 \pm 2e-03$ | $0.16 \pm 2e-03$ | $0.18 \pm 2e-03$ | $0.17 \pm 1e-03$ |
|            | Static   | $0.14 \pm 1e-02$ | $0.17 \pm 4e-03$ | $0.16 \pm 8e-03$ | $0.18 \pm 7e-03$ | $0.17 \pm 5e-03$ |

Table 4: **M-Swap** on the **Sprites** dataset for **MGP-VAE**.

| Category   | Type     | Movement         | Body             | Bottom           | Top              | Hair             |
|------------|----------|------------------|------------------|------------------|------------------|------------------|
| Uni-factor | Movement | $0.40 \pm 8e-03$ | $0.19 \pm 7e-03$ | $0.19 \pm 9e-03$ | $0.19 \pm 6e-03$ | $0.19 \pm 1e-02$ |
|            | Body     | $0.14 \pm 7e-03$ | $0.96 \pm 7e-03$ | $0.19 \pm 1e-02$ | $0.19 \pm 6e-03$ | $0.22 \pm 5e-03$ |
|            | Bottom   | $0.20 \pm 1e-02$ | $0.19 \pm 8e-03$ | $0.75 \pm 3e-03$ | $0.19 \pm 6e-03$ | $0.19 \pm 1e-02$ |
|            | Top      | $0.23 \pm 1e-02$ | $0.19 \pm 6e-03$ | $0.29 \pm 1e-02$ | $1.00 \pm 9e-04$ | $0.19 \pm 6e-03$ |
|            | Hair     | $0.14 \pm 7e-03$ | $0.19 \pm 8e-03$ | $0.19 \pm 1e-02$ | $0.19 \pm 6e-03$ | $0.71 \pm 5e-03$ |
| Two-factor | Dynamic  | $0.39 \pm 1e-02$ | $0.19 \pm 8e-03$ | $0.20 \pm 9e-03$ | $0.19 \pm 7e-03$ | $0.19 \pm 9e-03$ |
|            | Static   | $0.33 \pm 8e-03$ | $0.94 \pm 4e-03$ | $0.98 \pm 1e-03$ | $1.00 \pm 1e-03$ | $0.93 \pm 5e-03$ |

Table 5: **M-Swap** on the **Sprites** dataset for **SKD**.

| Category   | Type     | Movement         | Body             | Bottom           | Top              | Hair             |
|------------|----------|------------------|------------------|------------------|------------------|------------------|
| Uni-factor | Movement | $0.87 \pm 8e-02$ | $0.17 \pm 1e-02$ | $0.17 \pm 9e-03$ | $0.16 \pm 9e-03$ | $0.17 \pm 7e-03$ |
|            | Body     | $0.12 \pm 2e-02$ | $0.30 \pm 3e-02$ | $0.28 \pm 3e-02$ | $0.28 \pm 3e-02$ | $0.24 \pm 2e-02$ |
|            | Bottom   | $0.12 \pm 1e-02$ | $0.22 \pm 2e-02$ | $0.29 \pm 3e-02$ | $0.19 \pm 2e-02$ | $0.23 \pm 2e-02$ |
|            | Top      | $0.12 \pm 1e-02$ | $0.25 \pm 2e-02$ | $0.19 \pm 1e-02$ | $0.53 \pm 1e-02$ | $0.20 \pm 6e-03$ |
|            | Hair     | $0.12 \pm 1e-02$ | $0.19 \pm 1e-02$ | $0.17 \pm 1e-02$ | $0.15 \pm 9e-03$ | $0.21 \pm 1e-02$ |
| Two-factor | Dynamic  | $0.86 \pm 7e-02$ | $0.17 \pm 1e-02$ | $0.16 \pm 2e-02$ | $0.17 \pm 8e-03$ | $0.16 \pm 1e-02$ |
|            | Static   | $0.15 \pm 2e-02$ | $0.98 \pm 2e-02$ | $0.95 \pm 2e-02$ | $0.97 \pm 3e-02$ | $0.98 \pm 2e-02$ |

Table 6: **M-Swap** on the **Sprites** dataset for **SSM-SKD**.

| Category   | Type     | Movement         | Body             | Bottom           | Top              | Hair             |
|------------|----------|------------------|------------------|------------------|------------------|------------------|
| Uni-factor | Movement | $0.98 \pm 3e-03$ | $0.19 \pm 8e-03$ | $0.18 \pm 8e-03$ | $0.17 \pm 8e-03$ | $0.17 \pm 7e-03$ |
|            | Body     | $0.12 \pm 1e-02$ | $0.71 \pm 1e-02$ | $0.16 \pm 7e-03$ | $0.17 \pm 8e-03$ | $0.17 \pm 7e-03$ |
|            | Bottom   | $0.12 \pm 1e-02$ | $0.18 \pm 9e-03$ | $0.76 \pm 2e-02$ | $0.17 \pm 8e-03$ | $0.17 \pm 7e-03$ |
|            | Top      | $0.11 \pm 1e-02$ | $0.18 \pm 9e-03$ | $0.16 \pm 7e-03$ | $0.97 \pm 5e-03$ | $0.17 \pm 7e-03$ |
|            | Hair     | $0.11 \pm 1e-02$ | $0.17 \pm 9e-03$ | $0.16 \pm 7e-03$ | $0.17 \pm 8e-03$ | $0.99 \pm 2e-03$ |
| Two-factor | Dynamic  | $0.98 \pm 5e-03$ | $0.19 \pm 1e-02$ | $0.18 \pm 8e-03$ | $0.16 \pm 9e-03$ | $0.16 \pm 1e-02$ |
|            | Static   | $0.12 \pm 8e-03$ | $0.89 \pm 5e-03$ | $0.91 \pm 8e-03$ | $0.99 \pm 2e-03$ | $1.00 \pm 5e-04$ |

Table 7: **M-GSample** on the **Sprites** dataset for **Sparse-AE**.

| Category   | Type     | Movement         | Body             | Bottom           | Top              | Hair             |
|------------|----------|------------------|------------------|------------------|------------------|------------------|
| Uni-factor | Movement | $0.97 \pm 4e-03$ | $0.17 \pm 4e-03$ | $0.25 \pm 1e-02$ | $0.85 \pm 4e-03$ | $0.17 \pm 1e-02$ |
|            | Body     | $0.10 \pm 1e-02$ | $0.28 \pm 7e-03$ | $0.17 \pm 3e-03$ | $0.17 \pm 3e-03$ | $0.17 \pm 1e-02$ |
|            | Bottom   | $0.10 \pm 9e-03$ | $0.17 \pm 8e-03$ | $0.18 \pm 7e-03$ | $0.17 \pm 4e-03$ | $0.17 \pm 1e-02$ |
|            | Top      | $0.11 \pm 9e-03$ | $0.16 \pm 3e-03$ | $0.17 \pm 9e-03$ | $0.17 \pm 1e-03$ | $0.17 \pm 9e-03$ |
|            | Hair     | $0.11 \pm 1e-02$ | $0.18 \pm 7e-03$ | $0.23 \pm 1e-02$ | $0.17 \pm 7e-03$ | $0.55 \pm 4e-03$ |
| Two-factor | Dynamic  | $0.97 \pm 3e-03$ | $0.17 \pm 8e-03$ | $0.25 \pm 8e-03$ | $0.86 \pm 2e-03$ | $0.17 \pm 9e-03$ |
|            | Static   | $0.11 \pm 9e-03$ | $0.43 \pm 6e-03$ | $0.27 \pm 7e-03$ | $0.17 \pm 7e-03$ | $0.56 \pm 3e-03$ |

Table 8: M-GSample on the Sprites dataset for VAE.

| Category   | Type     | Movement         | Body             | Bottom           | Top              | Hair             |
|------------|----------|------------------|------------------|------------------|------------------|------------------|
| Uni-factor | Movement | $0.93 \pm 1e-02$ | $0.16 \pm 2e-03$ | $0.16 \pm 4e-03$ | $0.18 \pm 5e-03$ | $0.17 \pm 6e-03$ |
|            | Body     | $0.14 \pm 9e-03$ | $0.16 \pm 1e-02$ | $0.16 \pm 7e-03$ | $0.17 \pm 5e-03$ | $0.17 \pm 6e-03$ |
|            | Bottom   | $0.17 \pm 9e-03$ | $0.16 \pm 9e-03$ | $0.16 \pm 8e-03$ | $0.18 \pm 1e-02$ | $0.17 \pm 4e-03$ |
|            | Top      | $0.17 \pm 7e-03$ | $0.17 \pm 1e-02$ | $0.16 \pm 7e-03$ | $0.18 \pm 1e-02$ | $0.16 \pm 9e-03$ |
|            | Hair     | $0.15 \pm 1e-02$ | $0.16 \pm 6e-03$ | $0.16 \pm 7e-03$ | $0.17 \pm 5e-03$ | $0.16 \pm 8e-03$ |
| Two-factor | Dynamic  | $0.93 \pm 6e-03$ | $0.17 \pm 4e-03$ | $0.16 \pm 5e-03$ | $0.18 \pm 4e-03$ | $0.17 \pm 5e-03$ |
|            | Static   | $0.37 \pm 2e-02$ | $0.17 \pm 9e-03$ | $0.16 \pm 7e-03$ | $0.17 \pm 9e-03$ | $0.18 \pm 8e-03$ |

Table 9: M-GSample on the Sprites dataset for  $\beta$ -VAE.

| Category   | Type     | Movement         | Body             | Bottom           | Top              | Hair             |
|------------|----------|------------------|------------------|------------------|------------------|------------------|
| Uni-factor | Movement | $1.00 \pm 5e-04$ | $0.16 \pm 1e-03$ | $0.16 \pm 1e-03$ | $0.18 \pm 1e-03$ | $0.17 \pm 1e-03$ |
|            | Body     | $0.12 \pm 5e-03$ | $0.17 \pm 8e-03$ | $0.16 \pm 6e-03$ | $0.18 \pm 1e-02$ | $0.17 \pm 6e-03$ |
|            | Bottom   | $0.11 \pm 1e-02$ | $0.16 \pm 5e-03$ | $0.16 \pm 3e-03$ | $0.18 \pm 1e-02$ | $0.17 \pm 1e-02$ |
|            | Top      | $0.11 \pm 1e-02$ | $0.17 \pm 6e-03$ | $0.16 \pm 4e-03$ | $0.18 \pm 4e-03$ | $0.17 \pm 8e-03$ |
|            | Hair     | $0.12 \pm 7e-03$ | $0.17 \pm 8e-03$ | $0.16 \pm 5e-03$ | $0.18 \pm 5e-03$ | $0.17 \pm 7e-03$ |
| Two-factor | Dynamic  | $1.00 \pm 1e-03$ | $0.16 \pm 2e-03$ | $0.16 \pm 1e-03$ | $0.18 \pm 3e-03$ | $0.17 \pm 1e-03$ |
|            | Static   | $0.13 \pm 9e-03$ | $0.17 \pm 1e-02$ | $0.16 \pm 5e-03$ | $0.17 \pm 1e-02$ | $0.17 \pm 7e-03$ |

Table 10: M-GSample on the Sprites dataset for MGP-VAE.

| Category   | Type     | Movement         | Body             | Bottom           | Top              | Hair             |
|------------|----------|------------------|------------------|------------------|------------------|------------------|
| Uni-factor | Movement | $0.13 \pm 9e-03$ | $0.17 \pm 5e-03$ | $0.17 \pm 7e-03$ | $0.17 \pm 8e-03$ | $0.16 \pm 1e-02$ |
|            | Body     | $0.11 \pm 3e-03$ | $0.25 \pm 6e-03$ | $0.17 \pm 8e-03$ | $0.16 \pm 1e-02$ | $0.17 \pm 6e-03$ |
|            | Bottom   | $0.12 \pm 7e-03$ | $0.16 \pm 1e-02$ | $0.24 \pm 1e-02$ | $0.17 \pm 2e-02$ | $0.16 \pm 8e-03$ |
|            | Top      | $0.13 \pm 7e-03$ | $0.16 \pm 9e-03$ | $0.19 \pm 1e-02$ | $0.41 \pm 1e-02$ | $0.17 \pm 6e-03$ |
|            | Hair     | $0.10 \pm 5e-03$ | $0.17 \pm 6e-03$ | $0.16 \pm 5e-03$ | $0.16 \pm 1e-02$ | $0.24 \pm 2e-02$ |
| Two-factor | Dynamic  | $0.13 \pm 5e-03$ | $0.17 \pm 1e-02$ | $0.17 \pm 6e-03$ | $0.17 \pm 7e-03$ | $0.16 \pm 7e-03$ |
|            | Static   | $0.35 \pm 6e-03$ | $0.78 \pm 5e-03$ | $0.84 \pm 6e-03$ | $0.86 \pm 6e-03$ | $0.81 \pm 9e-03$ |

Table 11: M-GSample on the Sprites dataset for SKD.

| Category   | Type     | Movement         | Body             | Bottom           | Top              | Hair             |
|------------|----------|------------------|------------------|------------------|------------------|------------------|
| Uni-factor | Movement | $0.90 \pm 8e-02$ | $0.17 \pm 1e-02$ | $0.18 \pm 1e-02$ | $0.17 \pm 1e-02$ | $0.18 \pm 1e-02$ |
|            | Body     | $0.12 \pm 6e-03$ | $0.32 \pm 3e-02$ | $0.30 \pm 3e-02$ | $0.32 \pm 2e-02$ | $0.25 \pm 4e-02$ |
|            | Bottom   | $0.14 \pm 1e-02$ | $0.22 \pm 2e-02$ | $0.30 \pm 4e-02$ | $0.20 \pm 2e-02$ | $0.23 \pm 5e-03$ |
|            | Top      | $0.12 \pm 2e-02$ | $0.27 \pm 1e-02$ | $0.19 \pm 8e-03$ | $0.58 \pm 2e-02$ | $0.20 \pm 1e-02$ |
|            | Hair     | $0.12 \pm 1e-02$ | $0.19 \pm 1e-02$ | $0.17 \pm 1e-02$ | $0.14 \pm 8e-03$ | $0.22 \pm 2e-02$ |
| Two-factor | Dynamic  | $0.87 \pm 1e-01$ | $0.17 \pm 3e-03$ | $0.18 \pm 8e-03$ | $0.17 \pm 2e-02$ | $0.17 \pm 8e-03$ |
|            | Static   | $0.21 \pm 6e-02$ | $0.99 \pm 1e-02$ | $0.96 \pm 3e-02$ | $0.97 \pm 3e-02$ | $0.98 \pm 2e-02$ |

Table 12: M-GSample on the Sprites dataset for SSM-SKD.

| Category   | Type     | Movement         | Body             | Bottom           | Top              | Hair             |
|------------|----------|------------------|------------------|------------------|------------------|------------------|
| Uni-factor | Movement | $0.99 \pm 1e-03$ | $0.21 \pm 2e-02$ | $0.22 \pm 8e-03$ | $0.18 \pm 2e-02$ | $0.18 \pm 2e-02$ |
|            | Body     | $0.12 \pm 6e-03$ | $0.74 \pm 1e-02$ | $0.19 \pm 8e-03$ | $0.17 \pm 1e-02$ | $0.18 \pm 2e-02$ |
|            | Bottom   | $0.12 \pm 1e-02$ | $0.19 \pm 1e-02$ | $0.78 \pm 2e-02$ | $0.16 \pm 1e-02$ | $0.17 \pm 2e-02$ |
|            | Top      | $0.11 \pm 7e-03$ | $0.17 \pm 1e-02$ | $0.19 \pm 6e-03$ | $0.99 \pm 4e-03$ | $0.17 \pm 2e-02$ |
|            | Hair     | $0.12 \pm 8e-03$ | $0.18 \pm 9e-03$ | $0.18 \pm 3e-03$ | $0.16 \pm 2e-02$ | $1.00 \pm 1e-03$ |
| Two-factor | Dynamic  | $0.99 \pm 3e-03$ | $0.21 \pm 9e-03$ | $0.22 \pm 1e-02$ | $0.19 \pm 1e-02$ | $0.18 \pm 1e-02$ |
|            | Static   | $0.15 \pm 7e-03$ | $0.88 \pm 1e-02$ | $0.93 \pm 1e-02$ | $0.99 \pm 4e-03$ | $1.00 \pm 0e+00$ |

Table 13: **DCI** on the **Sprites** dataset for **Sparse-AE**.

| <b>None</b> | DCI-M $\uparrow$        | DCI-C $\uparrow$        | DCI-E $\uparrow$        |
|-------------|-------------------------|-------------------------|-------------------------|
| Movement    | $0.31 \pm 1\text{e-}02$ | $0.91 \pm 7\text{e-}03$ | $1.00 \pm 0\text{e+}00$ |
| Body        | $0.64 \pm 2\text{e-}02$ | $0.81 \pm 3\text{e-}03$ | $0.77 \pm 9\text{e-}03$ |
| Bottom      | $0.27 \pm 6\text{e-}03$ | $0.80 \pm 6\text{e-}03$ | $0.39 \pm 1\text{e-}02$ |
| Top         | $0.23 \pm 2\text{e-}02$ | $0.79 \pm 2\text{e-}03$ | $0.93 \pm 1\text{e-}02$ |
| Hair        | $0.47 \pm 8\text{e-}03$ | $0.85 \pm 3\text{e-}03$ | $0.91 \pm 9\text{e-}03$ |

Table 14: **DCI** on the **Sprites** dataset for **VAE**.

| <b>None</b> | DCI-M $\uparrow$        | DCI-C $\uparrow$        | DCI-E $\uparrow$        |
|-------------|-------------------------|-------------------------|-------------------------|
| Movement    | $0.73 \pm 2\text{e-}02$ | $0.97 \pm 1\text{e-}03$ | $0.99 \pm 1\text{e-}02$ |
| Body        | $0.12 \pm 4\text{e-}03$ | $0.74 \pm 2\text{e-}03$ | $0.17 \pm 4\text{e-}02$ |
| Bottom      | $0.12 \pm 2\text{e-}03$ | $0.74 \pm 1\text{e-}03$ | $0.16 \pm 2\text{e-}02$ |
| Top         | $0.12 \pm 4\text{e-}03$ | $0.74 \pm 2\text{e-}03$ | $0.17 \pm 1\text{e-}02$ |
| Hair        | $0.12 \pm 4\text{e-}03$ | $0.74 \pm 2\text{e-}03$ | $0.17 \pm 1\text{e-}02$ |

Table 15: **DCI** on the **Sprites** dataset for  $\beta$ -**VAE**.

| <b>None</b> | DCI-M $\uparrow$        | DCI-C $\uparrow$        | DCI-E $\uparrow$        |
|-------------|-------------------------|-------------------------|-------------------------|
| Movement    | $0.86 \pm 2\text{e-}02$ | $0.98 \pm 8\text{e-}04$ | $0.99 \pm 8\text{e-}03$ |
| Body        | $0.12 \pm 1\text{e-}03$ | $0.74 \pm 3\text{e-}03$ | $0.17 \pm 1\text{e-}02$ |
| Bottom      | $0.13 \pm 2\text{e-}03$ | $0.74 \pm 1\text{e-}03$ | $0.17 \pm 3\text{e-}02$ |
| Top         | $0.13 \pm 3\text{e-}03$ | $0.74 \pm 3\text{e-}03$ | $0.17 \pm 2\text{e-}02$ |
| Hair        | $0.12 \pm 2\text{e-}03$ | $0.74 \pm 1\text{e-}03$ | $0.16 \pm 2\text{e-}02$ |

Table 16: **DCI** on the **Sprites** dataset for **MGP-VAE**.

| <b>None</b> | DCI-M $\uparrow$        | DCI-C $\uparrow$        | DCI-E $\uparrow$        |
|-------------|-------------------------|-------------------------|-------------------------|
| Movement    | $0.61 \pm 8\text{e-}03$ | $0.48 \pm 2\text{e-}03$ | $0.95 \pm 8\text{e-}03$ |
| Body        | $0.63 \pm 9\text{e-}03$ | $0.83 \pm 6\text{e-}03$ | $0.89 \pm 1\text{e-}02$ |
| Bottom      | $0.72 \pm 3\text{e-}03$ | $0.63 \pm 8\text{e-}03$ | $0.94 \pm 5\text{e-}03$ |
| Top         | $0.29 \pm 4\text{e-}03$ | $1.00 \pm 2\text{e-}03$ | $1.00 \pm 3\text{e-}03$ |
| Hair        | $0.89 \pm 4\text{e-}03$ | $0.71 \pm 5\text{e-}03$ | $0.90 \pm 2\text{e-}02$ |

Table 17: **DCI** on the **Sprites** dataset for **SKD**.

| <b>None</b> | DCI-M $\uparrow$        | DCI-C $\uparrow$        | DCI-E $\uparrow$        |
|-------------|-------------------------|-------------------------|-------------------------|
| Movement    | $0.37 \pm 1\text{e-}02$ | $0.88 \pm 6\text{e-}03$ | $0.98 \pm 0\text{e+}00$ |
| Body        | $0.28 \pm 5\text{e-}03$ | $0.65 \pm 2\text{e-}02$ | $0.69 \pm 4\text{e-}03$ |
| Bottom      | $0.15 \pm 1\text{e-}02$ | $0.60 \pm 2\text{e-}03$ | $0.67 \pm 1\text{e-}02$ |
| Top         | $0.40 \pm 3\text{e-}03$ | $0.84 \pm 1\text{e-}03$ | $0.92 \pm 3\text{e-}03$ |
| Hair        | $0.14 \pm 2\text{e-}02$ | $0.58 \pm 2\text{e-}03$ | $0.62 \pm 4\text{e-}03$ |

Table 18: **DCI** on the **Sprites** dataset for **SSM-SKD**.

| <b>None</b> | DCI-M $\uparrow$        | DCI-C $\uparrow$        | DCI-E $\uparrow$        |
|-------------|-------------------------|-------------------------|-------------------------|
| Movement    | $0.88 \pm 5\text{e-}03$ | $0.91 \pm 1\text{e-}03$ | $0.97 \pm 0\text{e+}00$ |
| Body        | $0.91 \pm 4\text{e-}03$ | $0.91 \pm 8\text{e-}04$ | $0.97 \pm 4\text{e-}03$ |
| Bottom      | $0.79 \pm 6\text{e-}03$ | $0.97 \pm 1\text{e-}03$ | $0.99 \pm 0\text{e+}00$ |
| Top         | $0.91 \pm 3\text{e-}03$ | $0.98 \pm 3\text{e-}04$ | $0.99 \pm 0\text{e+}00$ |
| Hair        | $0.98 \pm 7\text{e-}04$ | $0.97 \pm 3\text{e-}03$ | $1.00 \pm 0\text{e+}00$ |

Table 19: **Consistency** on the **Sprites** dataset for **Sparse-AE**.

| Category             | Type   | Bottom                  | Hair                    | Body                    | Top                     |
|----------------------|--------|-------------------------|-------------------------|-------------------------|-------------------------|
| C-Swap $\uparrow$    | Bottom | $0.18 \pm 1\text{e-}02$ | $1.00 \pm 3\text{e-}04$ | $0.70 \pm 6\text{e-}03$ | $0.99 \pm 5\text{e-}04$ |
|                      | Hair   | $0.36 \pm 6\text{e-}03$ | $0.52 \pm 1\text{e-}02$ | $0.52 \pm 7\text{e-}03$ | $0.96 \pm 1\text{e-}03$ |
|                      | Body   | $0.44 \pm 8\text{e-}03$ | $1.00 \pm 2\text{e-}04$ | $0.37 \pm 1\text{e-}02$ | $0.97 \pm 1\text{e-}03$ |
|                      | Top    | $0.50 \pm 6\text{e-}04$ | $1.00 \pm 0\text{e+}00$ | $0.73 \pm 4\text{e-}04$ | $0.19 \pm 1\text{e-}02$ |
| C-Sample $\uparrow$  | Bottom | $0.95 \pm 2\text{e-}03$ | $0.97 \pm 2\text{e-}03$ | $0.98 \pm 2\text{e-}03$ | $0.99 \pm 3\text{e-}03$ |
|                      | Hair   | $0.95 \pm 3\text{e-}03$ | $0.97 \pm 1\text{e-}03$ | $0.98 \pm 1\text{e-}03$ | $0.98 \pm 2\text{e-}03$ |
|                      | Body   | $0.95 \pm 3\text{e-}03$ | $0.97 \pm 2\text{e-}03$ | $0.98 \pm 3\text{e-}03$ | $0.99 \pm 2\text{e-}03$ |
|                      | Top    | $0.95 \pm 3\text{e-}03$ | $0.97 \pm 2\text{e-}03$ | $0.98 \pm 2\text{e-}03$ | $0.98 \pm 1\text{e-}03$ |
| GC-Sample $\uparrow$ | Bottom | $0.95 \pm 2\text{e-}03$ | $0.98 \pm 1\text{e-}03$ | $0.98 \pm 8\text{e-}04$ | $0.99 \pm 2\text{e-}03$ |
|                      | Hair   | $0.95 \pm 3\text{e-}03$ | $0.98 \pm 7\text{e-}04$ | $0.98 \pm 3\text{e-}03$ | $0.98 \pm 2\text{e-}03$ |
|                      | Body   | $0.95 \pm 4\text{e-}03$ | $0.98 \pm 2\text{e-}03$ | $0.98 \pm 1\text{e-}03$ | $0.99 \pm 1\text{e-}03$ |
|                      | Top    | $0.95 \pm 2\text{e-}03$ | $0.98 \pm 3\text{e-}03$ | $0.98 \pm 3\text{e-}03$ | $0.98 \pm 1\text{e-}03$ |

Table 20: **Consistency** on the **Sprites** dataset for **VAE**.

| Category             | Type   | Top                     | Body                    | Hair                    | Bottom                  |
|----------------------|--------|-------------------------|-------------------------|-------------------------|-------------------------|
| C-Swap $\uparrow$    | Top    | $0.17 \pm 5\text{e-}03$ | $0.17 \pm 2\text{e-}03$ | $0.17 \pm 8\text{e-}04$ | $0.16 \pm 1\text{e-}03$ |
|                      | Body   | $0.17 \pm 8\text{e-}04$ | $0.17 \pm 5\text{e-}03$ | $0.17 \pm 4\text{e-}04$ | $0.16 \pm 2\text{e-}03$ |
|                      | Hair   | $0.17 \pm 2\text{e-}03$ | $0.17 \pm 1\text{e-}03$ | $0.17 \pm 6\text{e-}03$ | $0.16 \pm 1\text{e-}03$ |
|                      | Bottom | $0.17 \pm 1\text{e-}03$ | $0.17 \pm 2\text{e-}03$ | $0.17 \pm 9\text{e-}04$ | $0.16 \pm 8\text{e-}03$ |
| C-Sample $\uparrow$  | Top    | $0.83 \pm 5\text{e-}03$ | $0.92 \pm 1\text{e-}03$ | $0.92 \pm 2\text{e-}03$ | $0.83 \pm 1\text{e-}02$ |
|                      | Body   | $0.82 \pm 2\text{e-}03$ | $0.92 \pm 3\text{e-}03$ | $0.92 \pm 4\text{e-}03$ | $0.82 \pm 4\text{e-}03$ |
|                      | Hair   | $0.83 \pm 5\text{e-}03$ | $0.92 \pm 3\text{e-}03$ | $0.92 \pm 2\text{e-}03$ | $0.83 \pm 6\text{e-}03$ |
|                      | Bottom | $0.83 \pm 3\text{e-}03$ | $0.92 \pm 3\text{e-}03$ | $0.92 \pm 3\text{e-}03$ | $0.83 \pm 6\text{e-}03$ |
| GC-Sample $\uparrow$ | Top    | $0.79 \pm 5\text{e-}03$ | $0.90 \pm 3\text{e-}03$ | $0.91 \pm 5\text{e-}03$ | $0.81 \pm 5\text{e-}03$ |
|                      | Body   | $0.78 \pm 1\text{e-}02$ | $0.90 \pm 4\text{e-}03$ | $0.92 \pm 7\text{e-}03$ | $0.81 \pm 1\text{e-}03$ |
|                      | Hair   | $0.79 \pm 9\text{e-}03$ | $0.90 \pm 4\text{e-}03$ | $0.92 \pm 4\text{e-}03$ | $0.81 \pm 4\text{e-}03$ |
|                      | Bottom | $0.80 \pm 7\text{e-}03$ | $0.90 \pm 4\text{e-}03$ | $0.92 \pm 3\text{e-}03$ | $0.81 \pm 5\text{e-}03$ |

Table 21: **Consistency** on the **Sprites** dataset for  $\beta$ -VAE.

| Category             | Type   | Hair                    | Body                    | Bottom                  | Top                     |
|----------------------|--------|-------------------------|-------------------------|-------------------------|-------------------------|
| C-Swap $\uparrow$    | Hair   | $0.17 \pm 5\text{e-}03$ | $0.16 \pm 6\text{e-}04$ | $0.16 \pm 4\text{e-}04$ | $0.17 \pm 6\text{e-}04$ |
|                      | Body   | $0.17 \pm 1\text{e-}03$ | $0.17 \pm 6\text{e-}03$ | $0.17 \pm 3\text{e-}04$ | $0.17 \pm 9\text{e-}04$ |
|                      | Bottom | $0.17 \pm 9\text{e-}04$ | $0.16 \pm 6\text{e-}04$ | $0.16 \pm 6\text{e-}03$ | $0.17 \pm 8\text{e-}04$ |
|                      | Top    | $0.17 \pm 8\text{e-}04$ | $0.16 \pm 1\text{e-}03$ | $0.17 \pm 1\text{e-}03$ | $0.17 \pm 3\text{e-}03$ |
| C-Sample $\uparrow$  | Hair   | $0.92 \pm 7\text{e-}03$ | $0.91 \pm 6\text{e-}04$ | $0.85 \pm 3\text{e-}03$ | $0.84 \pm 4\text{e-}03$ |
|                      | Body   | $0.91 \pm 6\text{e-}03$ | $0.91 \pm 4\text{e-}03$ | $0.85 \pm 3\text{e-}03$ | $0.84 \pm 2\text{e-}03$ |
|                      | Bottom | $0.91 \pm 7\text{e-}03$ | $0.91 \pm 3\text{e-}03$ | $0.85 \pm 5\text{e-}03$ | $0.84 \pm 1\text{e-}03$ |
|                      | Top    | $0.91 \pm 5\text{e-}03$ | $0.91 \pm 2\text{e-}03$ | $0.85 \pm 2\text{e-}03$ | $0.84 \pm 4\text{e-}03$ |
| GC-Sample $\uparrow$ | Hair   | $0.90 \pm 3\text{e-}03$ | $0.89 \pm 6\text{e-}03$ | $0.83 \pm 1\text{e-}02$ | $0.82 \pm 1\text{e-}02$ |
|                      | Body   | $0.90 \pm 5\text{e-}03$ | $0.89 \pm 5\text{e-}03$ | $0.83 \pm 6\text{e-}03$ | $0.82 \pm 5\text{e-}03$ |
|                      | Bottom | $0.90 \pm 9\text{e-}03$ | $0.89 \pm 4\text{e-}03$ | $0.83 \pm 3\text{e-}03$ | $0.82 \pm 8\text{e-}03$ |
|                      | Top    | $0.90 \pm 5\text{e-}03$ | $0.89 \pm 5\text{e-}03$ | $0.83 \pm 4\text{e-}03$ | $0.82 \pm 8\text{e-}03$ |

Table 22: **Consistency** on the **Sprites** dataset for MGP-VAE.

| Category             | Type   | Hair                    | Body                    | Bottom                  | Top                     |
|----------------------|--------|-------------------------|-------------------------|-------------------------|-------------------------|
| C-Swap $\uparrow$    | Hair   | $0.71 \pm 1\text{e-}02$ | $0.98 \pm 2\text{e-}03$ | $0.99 \pm 2\text{e-}03$ | $1.00 \pm 3\text{e-}04$ |
|                      | Body   | $0.80 \pm 8\text{e-}03$ | $0.96 \pm 4\text{e-}03$ | $0.99 \pm 3\text{e-}03$ | $1.00 \pm 1\text{e-}03$ |
|                      | Bottom | $0.96 \pm 4\text{e-}03$ | $0.95 \pm 2\text{e-}03$ | $0.75 \pm 4\text{e-}03$ | $1.00 \pm 5\text{e-}04$ |
|                      | Top    | $0.81 \pm 5\text{e-}03$ | $0.97 \pm 3\text{e-}03$ | $0.76 \pm 3\text{e-}03$ | $1.00 \pm 6\text{e-}04$ |
| C-Sample $\uparrow$  | Hair   | $0.84 \pm 6\text{e-}03$ | $0.79 \pm 3\text{e-}03$ | $0.77 \pm 6\text{e-}03$ | $0.78 \pm 2\text{e-}03$ |
|                      | Body   | $0.84 \pm 7\text{e-}03$ | $0.79 \pm 6\text{e-}03$ | $0.78 \pm 3\text{e-}03$ | $0.78 \pm 9\text{e-}03$ |
|                      | Bottom | $0.83 \pm 8\text{e-}03$ | $0.77 \pm 4\text{e-}03$ | $0.75 \pm 8\text{e-}03$ | $0.78 \pm 6\text{e-}03$ |
|                      | Top    | $0.85 \pm 4\text{e-}03$ | $0.78 \pm 6\text{e-}03$ | $0.80 \pm 8\text{e-}03$ | $0.78 \pm 4\text{e-}03$ |
| GC-Sample $\uparrow$ | Hair   | $0.81 \pm 8\text{e-}03$ | $0.75 \pm 1\text{e-}02$ | $0.74 \pm 6\text{e-}03$ | $0.75 \pm 4\text{e-}03$ |
|                      | Body   | $0.81 \pm 4\text{e-}03$ | $0.75 \pm 9\text{e-}03$ | $0.75 \pm 8\text{e-}03$ | $0.75 \pm 4\text{e-}03$ |
|                      | Bottom | $0.80 \pm 5\text{e-}03$ | $0.73 \pm 4\text{e-}03$ | $0.70 \pm 9\text{e-}03$ | $0.73 \pm 4\text{e-}03$ |
|                      | Top    | $0.81 \pm 5\text{e-}03$ | $0.75 \pm 6\text{e-}03$ | $0.76 \pm 8\text{e-}03$ | $0.76 \pm 7\text{e-}03$ |

Table 23: **Consistency** on the **Sprites** dataset for **SKD**.

| Category             | Type   | Hair                    | Bottom                  | Top                     | Body                    |
|----------------------|--------|-------------------------|-------------------------|-------------------------|-------------------------|
| C-Swap $\uparrow$    | Hair   | $0.20 \pm 7\text{e-}03$ | $0.70 \pm 7\text{e-}02$ | $0.75 \pm 2\text{e-}02$ | $0.71 \pm 3\text{e-}02$ |
|                      | Bottom | $0.38 \pm 3\text{e-}02$ | $0.30 \pm 4\text{e-}02$ | $0.64 \pm 2\text{e-}02$ | $0.47 \pm 4\text{e-}02$ |
|                      | Top    | $0.42 \pm 7\text{e-}03$ | $0.59 \pm 1\text{e-}02$ | $0.53 \pm 2\text{e-}02$ | $0.44 \pm 1\text{e-}02$ |
|                      | Body   | $0.37 \pm 5\text{e-}02$ | $0.40 \pm 5\text{e-}02$ | $0.65 \pm 1\text{e-}01$ | $0.29 \pm 1\text{e-}02$ |
| C-Sample $\uparrow$  | Hair   | $0.95 \pm 4\text{e-}03$ | $0.91 \pm 3\text{e-}03$ | $0.97 \pm 4\text{e-}03$ | $0.91 \pm 4\text{e-}03$ |
|                      | Bottom | $0.98 \pm 2\text{e-}03$ | $0.94 \pm 3\text{e-}03$ | $0.98 \pm 1\text{e-}03$ | $0.96 \pm 2\text{e-}03$ |
|                      | Top    | $0.97 \pm 3\text{e-}03$ | $0.95 \pm 2\text{e-}03$ | $0.96 \pm 3\text{e-}03$ | $0.95 \pm 4\text{e-}03$ |
|                      | Body   | $0.96 \pm 3\text{e-}03$ | $0.91 \pm 4\text{e-}03$ | $0.97 \pm 7\text{e-}04$ | $0.94 \pm 2\text{e-}03$ |
| GC-Sample $\uparrow$ | Hair   | $0.95 \pm 1\text{e-}02$ | $0.93 \pm 8\text{e-}03$ | $0.98 \pm 2\text{e-}03$ | $0.92 \pm 1\text{e-}02$ |
|                      | Bottom | $0.99 \pm 2\text{e-}03$ | $0.96 \pm 3\text{e-}03$ | $0.98 \pm 2\text{e-}03$ | $0.97 \pm 3\text{e-}03$ |
|                      | Top    | $0.98 \pm 1\text{e-}03$ | $0.97 \pm 2\text{e-}03$ | $0.97 \pm 9\text{e-}04$ | $0.96 \pm 2\text{e-}03$ |
|                      | Body   | $0.96 \pm 1\text{e-}02$ | $0.93 \pm 7\text{e-}03$ | $0.98 \pm 6\text{e-}03$ | $0.95 \pm 9\text{e-}03$ |

Table 24: **Consistency** on the **Sprites** dataset for **SSM-SKD**.

| Category             | Type   | Top                     | Hair                    | Body                    | Bottom                  |
|----------------------|--------|-------------------------|-------------------------|-------------------------|-------------------------|
| C-Swap $\uparrow$    | Top    | $0.97 \pm 4\text{e-}03$ | $1.00 \pm 0\text{e+}00$ | $0.98 \pm 3\text{e-}03$ | $0.98 \pm 2\text{e-}03$ |
|                      | Hair   | $1.00 \pm 0\text{e+}00$ | $1.00 \pm 2\text{e-}03$ | $0.97 \pm 3\text{e-}03$ | $0.98 \pm 3\text{e-}03$ |
|                      | Body   | $1.00 \pm 6\text{e-}04$ | $1.00 \pm 5\text{e-}04$ | $0.70 \pm 1\text{e-}02$ | $0.95 \pm 4\text{e-}03$ |
|                      | Bottom | $1.00 \pm 4\text{e-}04$ | $1.00 \pm 0\text{e+}00$ | $0.91 \pm 4\text{e-}03$ | $0.73 \pm 1\text{e-}02$ |
| C-Sample $\uparrow$  | Top    | $0.99 \pm 9\text{e-}04$ | $0.99 \pm 9\text{e-}04$ | $0.95 \pm 2\text{e-}03$ | $0.91 \pm 3\text{e-}03$ |
|                      | Hair   | $0.99 \pm 1\text{e-}03$ | $1.00 \pm 3\text{e-}04$ | $0.95 \pm 3\text{e-}03$ | $0.91 \pm 2\text{e-}03$ |
|                      | Body   | $0.99 \pm 3\text{e-}03$ | $0.99 \pm 2\text{e-}03$ | $0.96 \pm 3\text{e-}03$ | $0.91 \pm 1\text{e-}03$ |
|                      | Bottom | $0.99 \pm 1\text{e-}03$ | $0.99 \pm 2\text{e-}03$ | $0.95 \pm 2\text{e-}03$ | $0.91 \pm 5\text{e-}03$ |
| GC-Sample $\uparrow$ | Top    | $1.00 \pm 5\text{e-}04$ | $0.99 \pm 8\text{e-}04$ | $0.97 \pm 2\text{e-}03$ | $0.94 \pm 3\text{e-}03$ |
|                      | Hair   | $0.99 \pm 2\text{e-}03$ | $1.00 \pm 2\text{e-}04$ | $0.96 \pm 3\text{e-}03$ | $0.94 \pm 3\text{e-}03$ |
|                      | Body   | $0.99 \pm 2\text{e-}03$ | $0.99 \pm 6\text{e-}04$ | $0.97 \pm 2\text{e-}03$ | $0.93 \pm 2\text{e-}03$ |
|                      | Bottom | $0.99 \pm 2\text{e-}03$ | $0.99 \pm 1\text{e-}03$ | $0.96 \pm 3\text{e-}03$ | $0.94 \pm 2\text{e-}03$ |
